# Supplementary material
Source: PubMed Central journal article supplement (PMC3344385)
Supplement: NIHMS352323-supplement-SupMat.pdf [file NIHMS352323-supplement-SupMat.pdf]

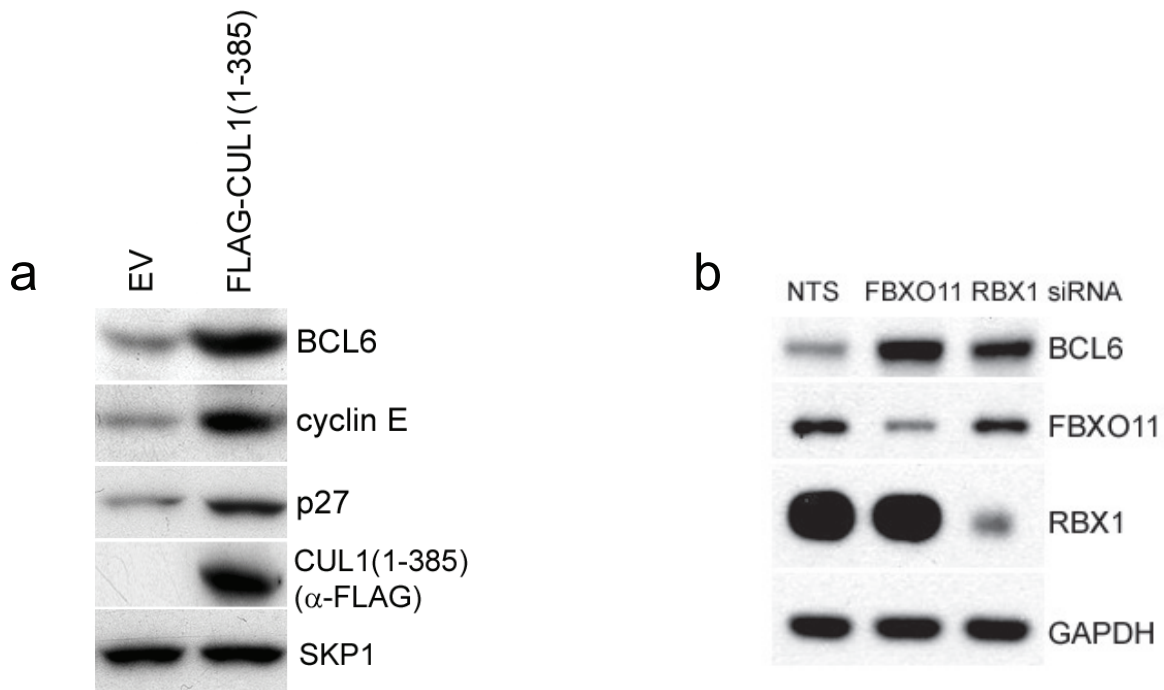

**Supplementary Figure 1. BCL6 levels increase in response to the expression of a dominant negative CUL1 mutant or silencing of RBX1.**

**a**, Ramos cells were infected with an empty virus (EV) or a virus expressing FLAG-tagged Cul1(1-385). Twenty-four hours post-infection, cells were harvested for immunoblotting as indicated. BCL6 levels increased in cells expressing Cul1(1-385), similar to p27 and cyclin E, two established SCF substrates<sup>1-3</sup>.

**b**, SK-MEL-28 cells were transfected with either short interfering RNAs (siRNAs) to the indicated mRNAs or a non-targeting siRNA (NTS). Cells were collected 48 hours after transfection, lysed, and processed for immunoblotting with antibodies to the indicated proteins.

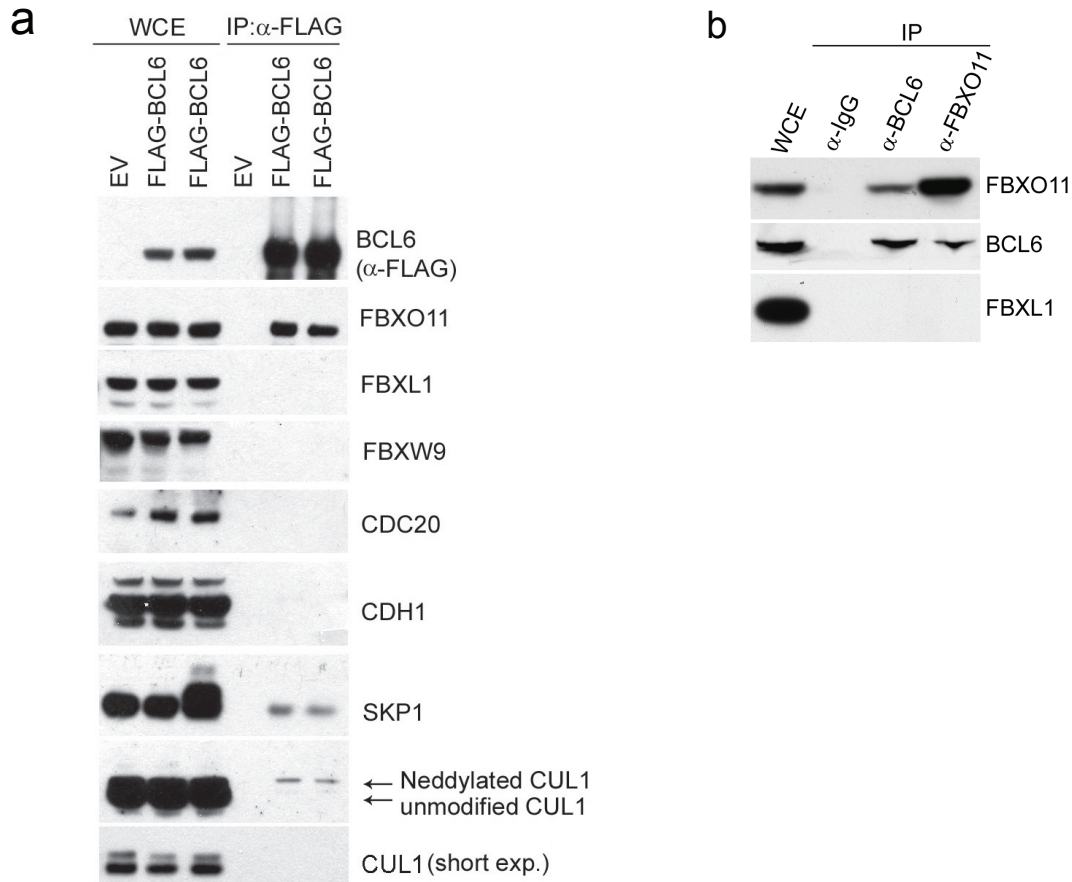

### Supplementary Figure 2. BCL6 specifically interacts with FBXO11.

**a**, BCL6 specifically interacts with endogenous FBXO11. HEK-293T cells were transfected with FLAG-tagged BCL6 (in duplicate) or an empty vector (EV). Whole cell extracts (WCE) were immunoprecipitated (IP) with anti-FLAG resin and probed with antibodies to the indicated proteins. Exogenous BCL6 interacted with endogenous FBXO11, SKP1, and neddylated CUL1 (the form of CUL1 which preferentially binds SCF substrates), but not FBXL1, FBXW9, CDC20, or CDH1.

**b**, Endogenous FBXO11 and endogenous BCL6 associate in normal B-cells. B-cells from healthy immunized mice were treated with MG132 2.5 hours prior to lysis. Lysates were immunoprecipitated with either a polyclonal antibody against FBXO11, a polyclonal antibody to BCL6, or a nonspecific rabbit IgG and analyzed by immunoblotting as indicated.

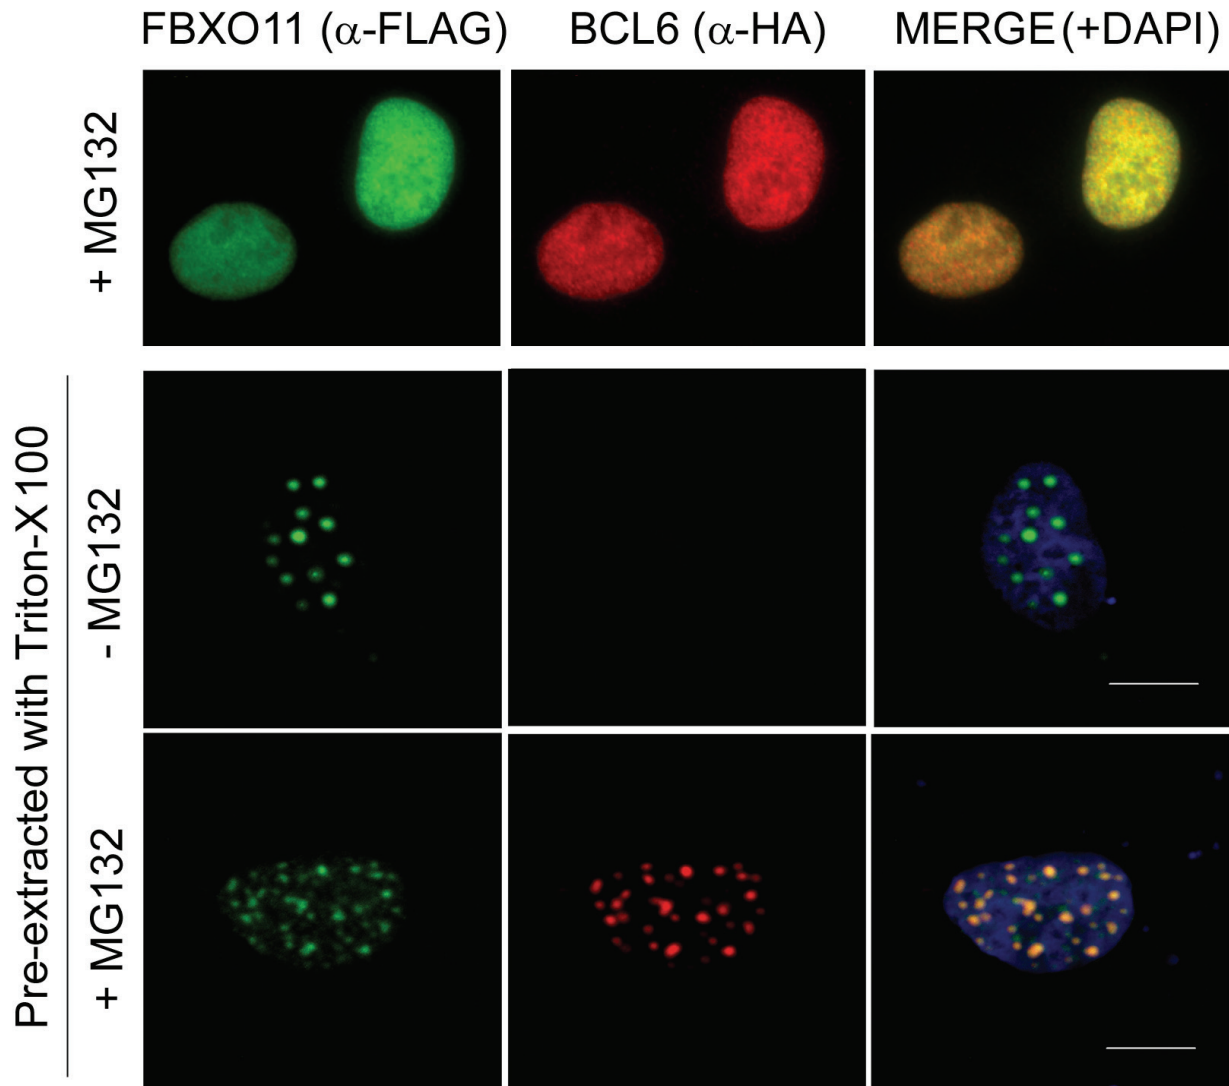

**Supplementary Figure 3. BCL6 and FBXO11 colocalize in the nucleus.**

U-2 OS cells were transfected with HA-tagged BCL6 and FLAG-tagged FBXO11. Twenty-four hours after transfection, cells were immunostained as indicated. Soluble nuclear proteins in the cells in the bottom panels were pre-extracted with 0.5% Triton-X100 prior to immunostaining. Where indicated, MG132 was added to prevent the degradation of BCL6. In the merged image, yellow shows colocalization of FBXO11 and BCL6. Both proteins were localized in the nucleus, but, after *in situ* cell fractionation, BCL6 and FBXO11 displayed an overlapping punctuate staining for throughout the nucleoplasm.

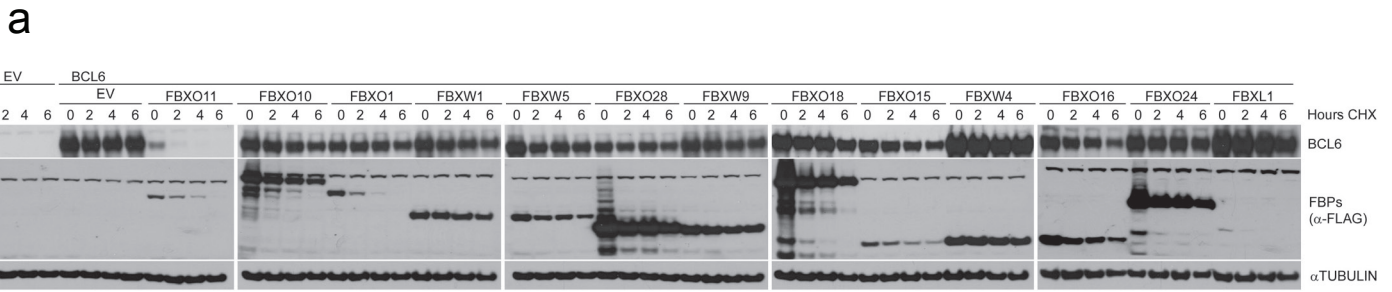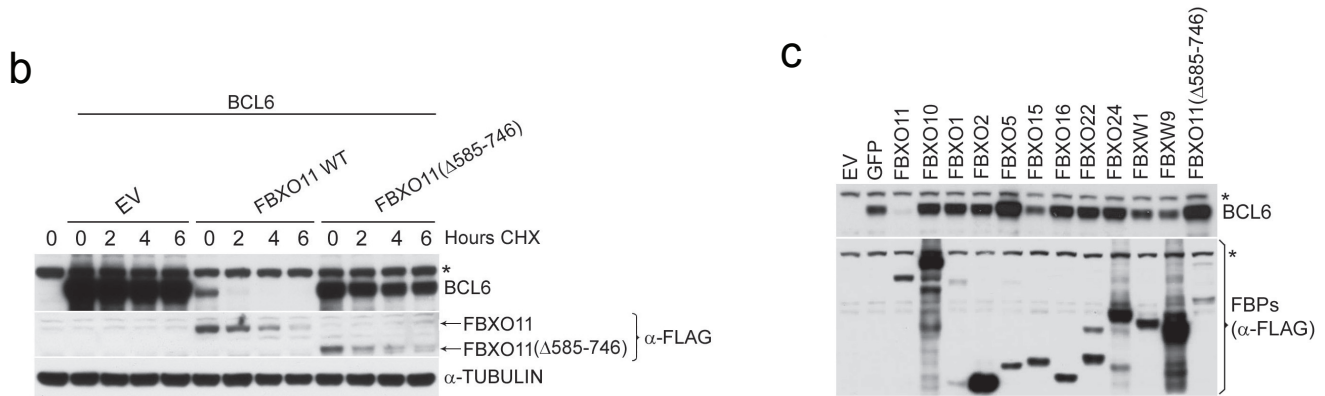

**Supplementary Figure 4. Expression of FBXO11 induces a reduction in the levels and stability of BCL6.**

**a**, FBXO11 is the only F-box protein that promotes efficient BCL6 degradation. HEK-293T cells were transfected with BCL6 in combination with either an empty vector (EV) or the indicated FLAG-tagged F-box proteins. Twenty-four hours post-transfection, cells were treated with cycloheximide (CHX), and samples were harvested at the indicated time points for immunoblotting. The lysates in the first four lanes are from cells transfected with EV alone.

**b**, FBXO11-mediated degradation of BCL6 requires the presumptive substrate recognition domain in FBXO11. HEK-293T cells were transfected with BCL6 in combination with either an empty vector (EV), FLAG-tagged FBXO11, or FLAG-tagged FBXO11(Δ585-746), an FBXO11 mutant missing the third of three CASH domains, the presumptive substrate recognition domains of FBXO11. Twenty-four hours post-transfection, cells were treated with cycloheximide (CHX), and samples were harvested at the indicated time points for immunoblotting. The lysate shown in the first lane is from untransfected cells. The asterisk denotes a non-specific band present in the anti-BCL6 blot. FBXO11(Δ585-746) was unable to induce BCL6 degradation, in agreement with its inability to bind BCL6 (as shown in Fig. 1A).

**c**, FBXO11 is the only F-box protein that promotes a reduction in BCL6 levels. HEK-293T cells were transfected with BCL6 alone or in combination with either an empty vector (EV), GFP, or the indicated FLAG-tagged F-box proteins. Twenty-four hours after transfection, cells were harvested, lysed, and processed for immunoblotting as indicated. The lysate in the first lane is from cells transfected with EV alone. The asterisks denote non-specific bands.

**a**

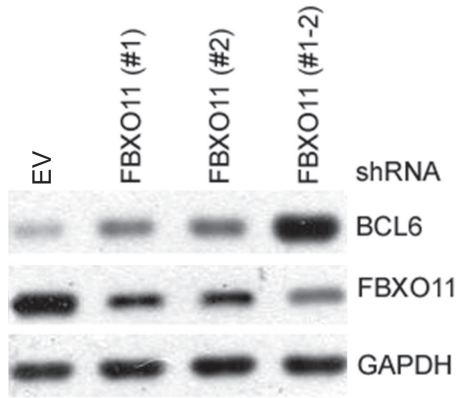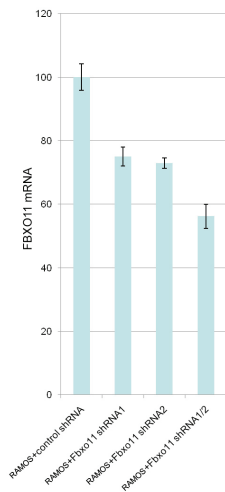

**b**

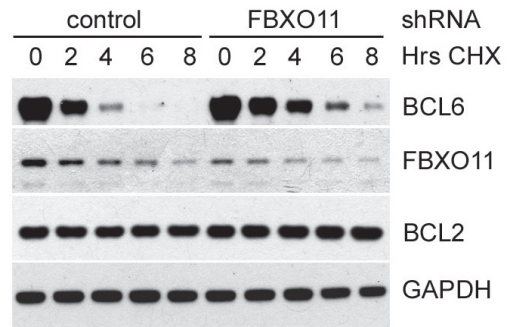

**c**

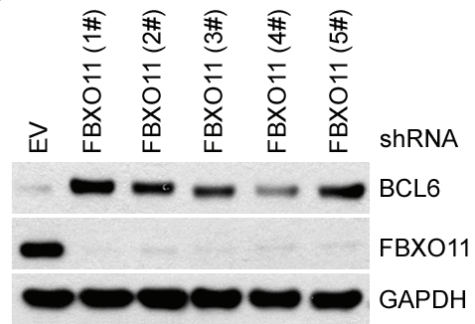

**d**

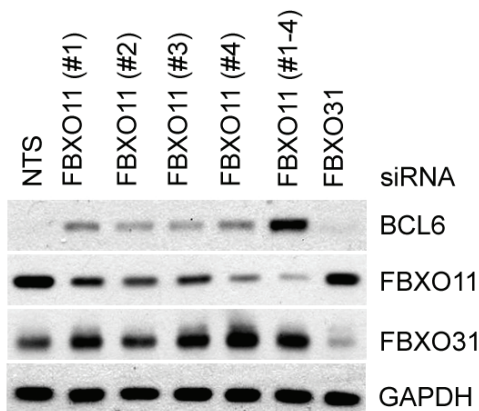

**e**

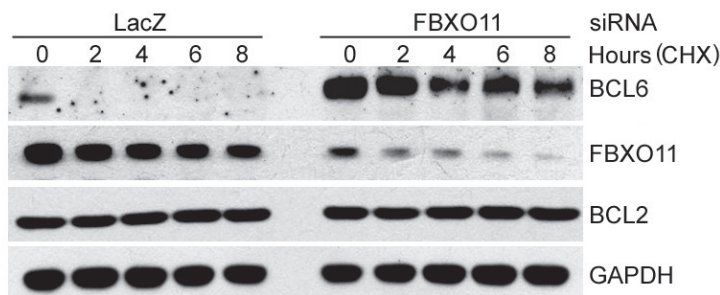

**Supplementary Figure 5. Silencing of *FBXO11* results in increased levels and stability of BCL6.**

**a**, Ramos cells were infected with either viruses expressing two different *FBXO11* shRNAs (alone or in combination) or an empty virus (EV), and selected for 72 hours. Protein extracts were then immunoblotted for the indicated proteins. The bottom panel shows the analysis of *FBXO11* mRNA by quantitative Real-Time PCR in triplicate measurements ( $\pm$ SD). The amount of *FBXO11* mRNA present in the sample treated with the control shRNA was set as 100. Although both constructs alone targeted *FBXO11*, the combination of both was more efficient in silencing *FBXO11* expression. Accordingly, the combination of both constructs produced a more robust effect on BCL6 levels.

**b**, Ramos cells were infected with either viruses expressing two different *FBXO11* shRNAs (in combination) or an empty virus (EV), selected, and treated with cycloheximide for the indicated times. Protein extracts were immunoblotted for the indicated proteins.

**c**, SK-MEL-28 cells were infected with either viruses expressing five different *FBXO11* shRNAs or an empty virus (EV), and selected for 72 hours. Protein extracts were immunoblotted for the indicated proteins. [SK-MEL-28 melanoma cells express *BCL6* mRNA (<http://biogps.gnf.org/#goto=genereport&id=604>), in line with the evidence that BCL6 expression is not limited to the B-cell compartment. Indeed, primary melanocytes also express *BCL6* mRNA<sup>4</sup>, and high levels of the BCL6 is associated with shorter survival in melanoma patients<sup>5</sup>.]

**d**, SK-MEL-28 cells were transfected with either short interfering RNAs (siRNAs) to the indicated mRNAs (using four different oligos, alone or in combination for *FBXO11*) or a non-targeting siRNA (NTS). Cells were collected 48 hours after transfection, lysed, and processed for immunoblotting with antibodies to the indicated proteins. Although each of the four oligos induced *FBXO11* downregulation alone, a pool of all four was more efficient in silencing *FBXO11* expression and produced a more robust effect on BCL6 levels.

**e**, SK-MEL-28 cells were transfected with siRNAs to either a non-relevant mRNA (*LacZ*) or *FBXO11* mRNA (using a combination of four different oligos). Cells were treated with cycloheximide for the indicated times. Protein extracts were immunoblotted for the indicated proteins.

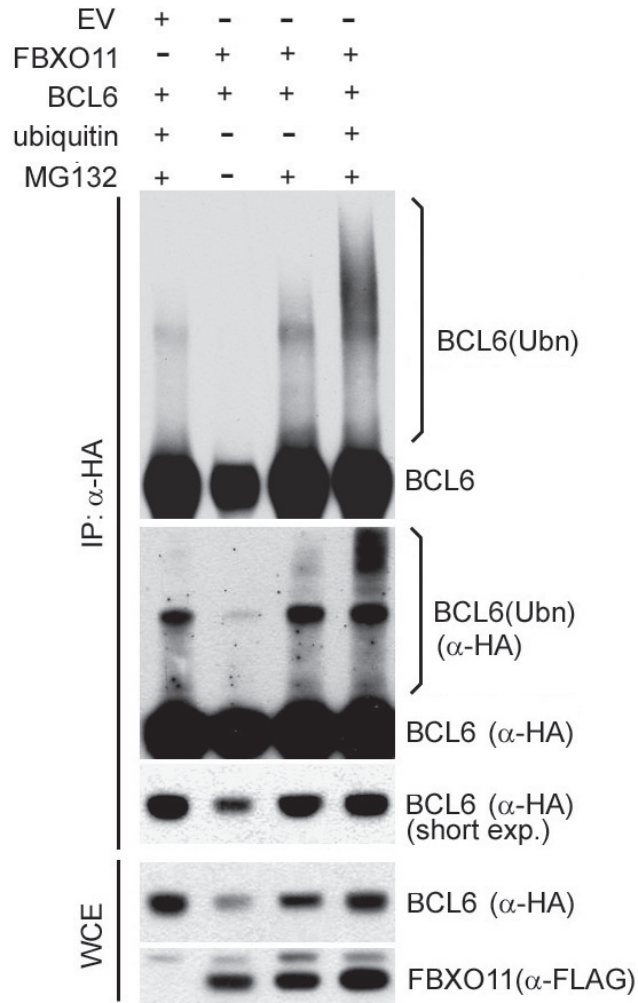

**Supplementary Figure 6. FBXO11 promotes BCL6 ubiquitylation *in vivo*.**

HeLa cells were transfected with the indicated constructs and treated with MG132 as indicated. Whole cell extracts were denatured, immunoprecipitated with an anti-HA antibody ( $\alpha$ -HA), and immunoblotted as indicated. The bracket on the left side of the top two panels marks a ladder of bands >86 kDa that corresponds to ubiquitylated BCL6.

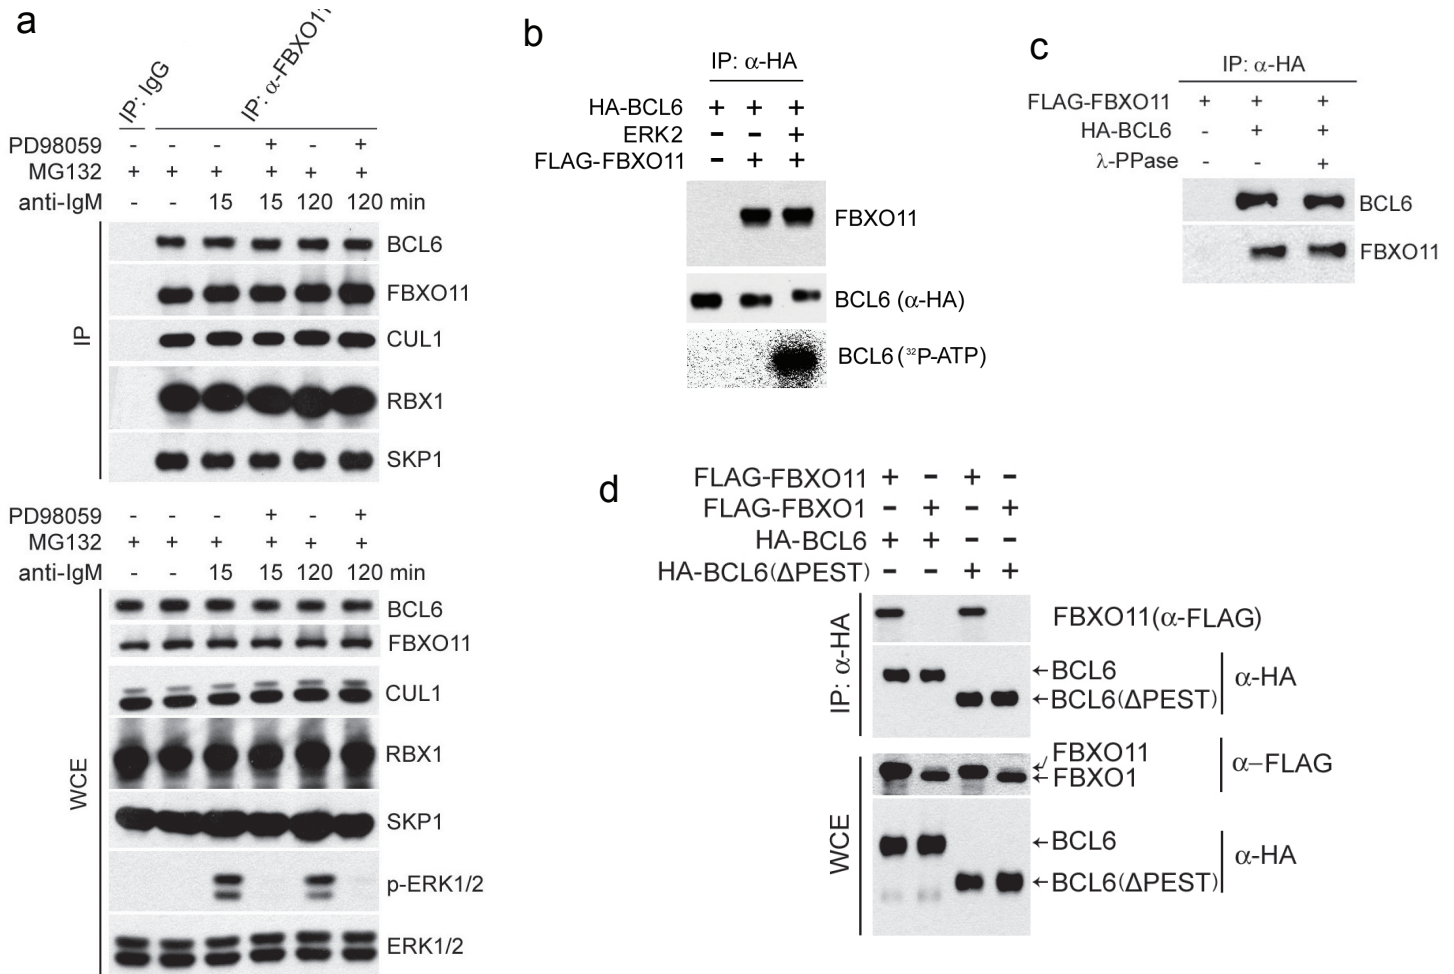

**Supplementary Figure 7. FBXO11 binding to BCL6 is independent of B-cell antigen-receptor signaling and the MAPK pathway.**

**a**, Ramos cells were incubated with anti-IgM antibodies [a treatment that mimics B-cell antigen-receptor signaling and activates ERK2 (ref<sup>6</sup>)] in the presence of MG132 and in the presence or absence of PD98059, a MEK inhibitor, as indicated. Cells were lysed and extracts were immunoprecipitated with an anti-FBXO11 antibody. Immunoprecipitates and whole cell extracts (WCE) were immunoblotted for the indicated proteins.

**b**, *In vitro* transcribed/translated, HA-tagged BCL6 was purified with anti-HA agarose and subjected to a kinase reaction in the presence or absence of purified ERK2 using [ $\gamma$ -<sup>32</sup>P]-ATP. BCL6 was then incubated with purified FLAG-FBXO11, re-purified with anti-HA agarose, and subjected to immunoblotting as indicated (top two panels). Only when incubated with ERK2, BCL6 displayed a gel shift, indicating that the majority of BCL6 was phosphorylated. The bottom panel shows a PhosphorImaging analysis of the kinase reaction product confirming that BCL6 is phosphorylated by ERK2.



**c,** *In vitro* transcribed/translated, HA-tagged BCL6 was purified with anti-HA agarose and treated with  $\lambda$ -phosphatase. (This  $\lambda$ -phosphatase treatment inhibited the binding of FBXW11 to one of its established substrates; not shown) BCL6 was then incubated with *in vitro* transcribed/translated FLAG-FBXO11, repurified with anti-HA agarose, and subjected to immunoblotting as indicated.

**d,** HEK-293T cells were transfected with either HA-tagged BCL6 or HA-tagged BCL6( $\Delta$ PEST), a mutant lacking amino acids 300-417, together with either FLAG-FBXO11 or FLAG-FBXO1, as indicated. Cells were treated with MG132 during the last five hours prior to harvest. Whole cell lysates (WCE) were purified with anti-HA agarose, and subjected to immunoblotting as indicated.

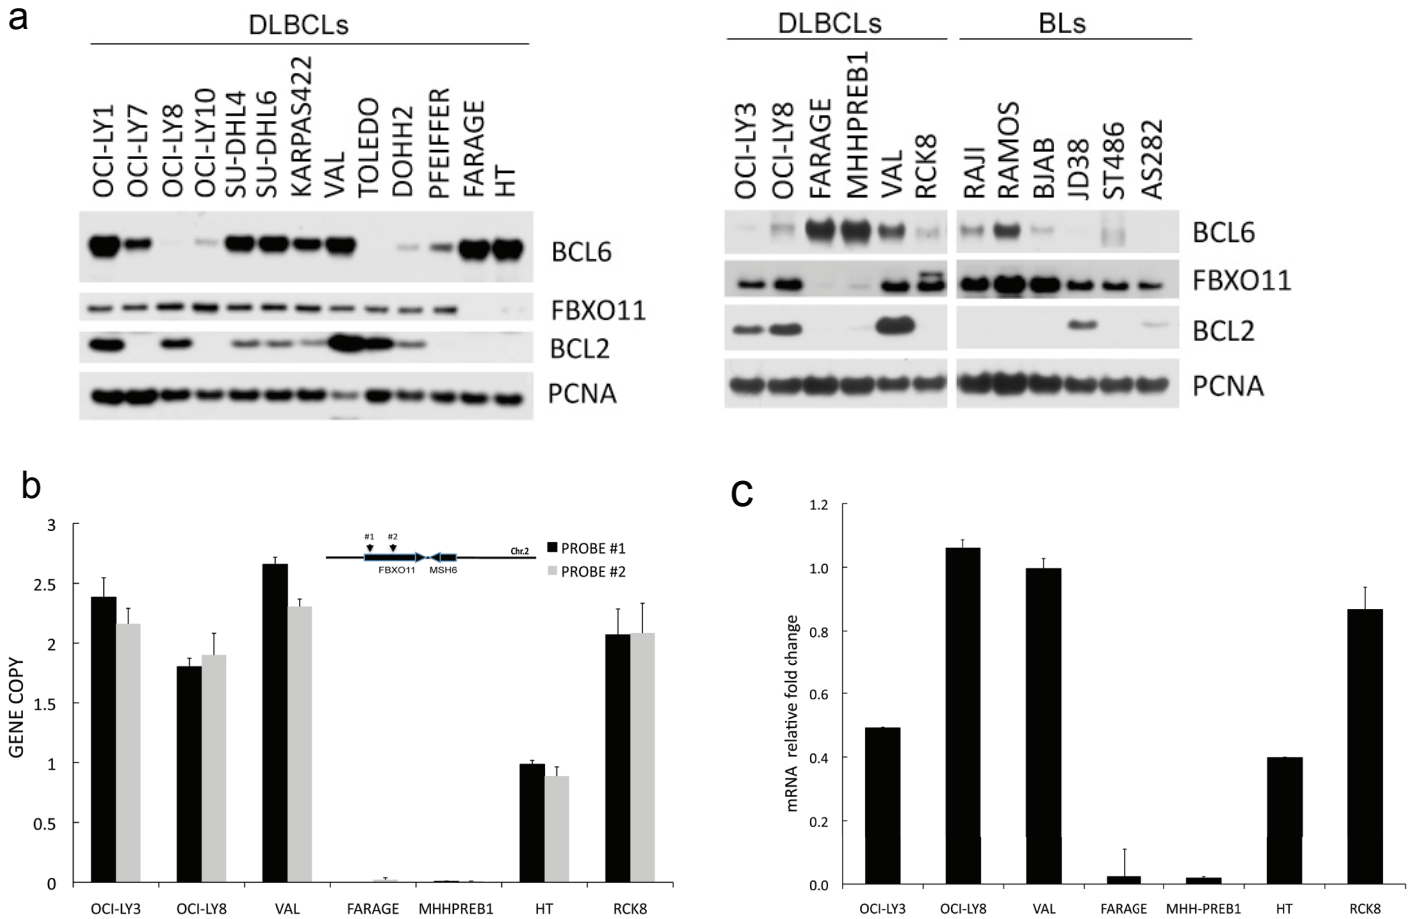

**Supplementary Figure 8. *FBXO11* is homozygously deleted in FARAGE and MHHPREB1 cells and hemizygotously deleted in HT cells.**

**a**, Sixteen DLBCL cell lines and six Burkitt's lymphoma cell lines (BL) were analyzed by immunoblotting for the indicated proteins.

**b**, The histograms illustrate the mean value ratios of a quantitative Real Time-PCR (qRT-PCR) analysis of *FBXO11* gene copy number. The  $C_t$  values for two independent primer sets (depicted in the figure, see also Supplementary Table 3) were normalized using the median of gene copy numbers obtained with specific primers for loci on chromosomes 5, 6, and 12. The results are expressed as the amount of *FBXO11* DNA relative to these loci and are compared to the ratio found in primary human fibroblasts. The standard deviations were calculated from two experiments performed in duplicate.

**c**, The histograms illustrate the mean value ratios of a qRT-PCR analysis of *FBXO11* mRNA. The results are expressed as the amount of *FBXO11* mRNA relative to three housekeeping genes (*SDHA*, *GAPDH*, and *RPS13*). The amount of *FBXO11* mRNA present in VAL cells was set as 1.

**a**

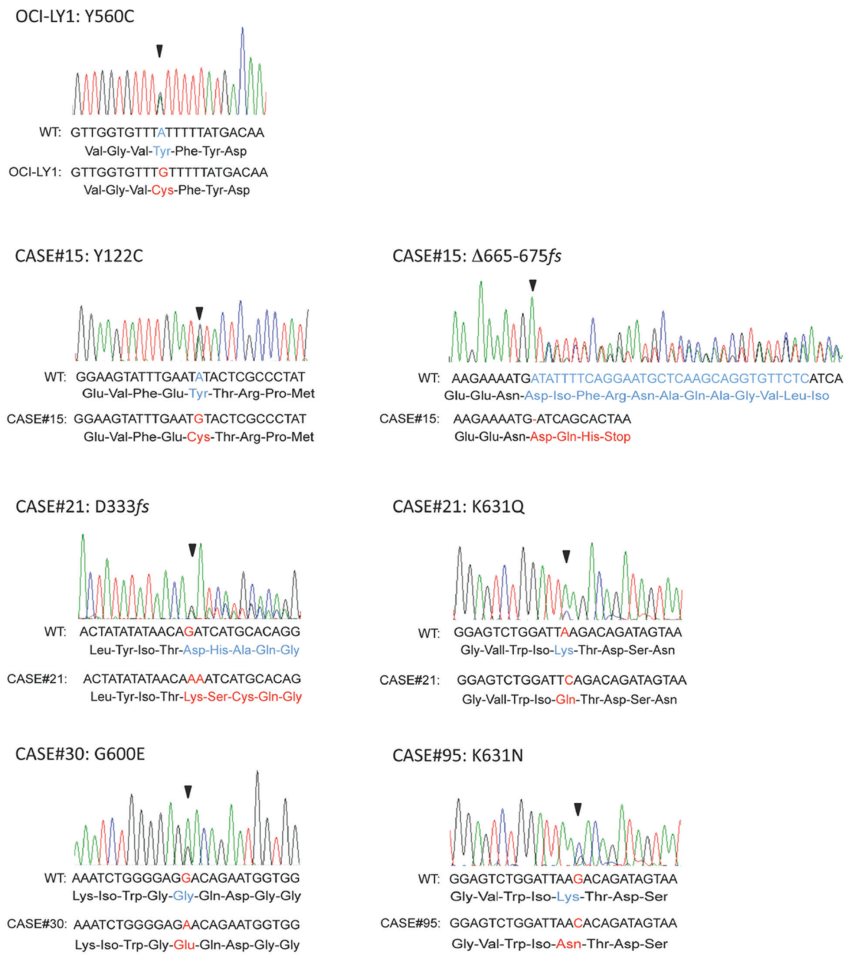

**b**

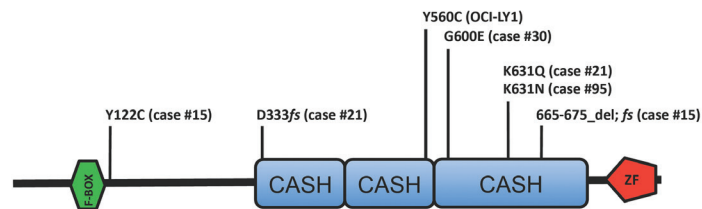

**c**

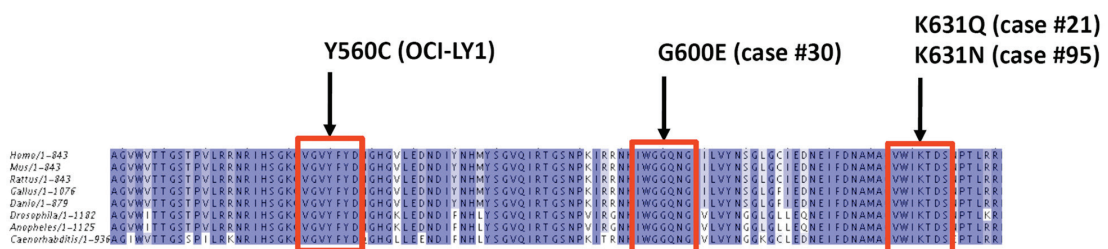

**Supplementary Figure 9. *FBXO11* is mutated in OCI-LY1 cells and primary DLBCLs.**

**a,** The chromatograms display *FBXO11* mutations (indicated by an arrow) identified by sequencing of RT-PCR products from the genomes of OCI-LY1 cells or the indicated DLBCLs (see Supplementary Table 1). Genomic DNA from six other DLBCL cell lines (OCI-LY3, OCI-LY8, SUDHL6, HT, RCK8, and VAL) was also sequenced, but no mutations in *FBXO11* were identified.

**b,** Mutations found in human DLBCLs are indicated above the domain structure of human *FBXO11*. In parenthesis, tumor numbers are indicated (see Table 1).

**c,** The amino acids changed in *FBXO11* in OCI-LY1 cells and primary DLBCLs are conserved from worms to humans. The figure shows the alignment of the region in *FBXO11* (from different species) that contains the amino acids changed in OCI-LY1 cells and primary DLBCLs. The red frame indicates the three amino acids found mutated in tumors.

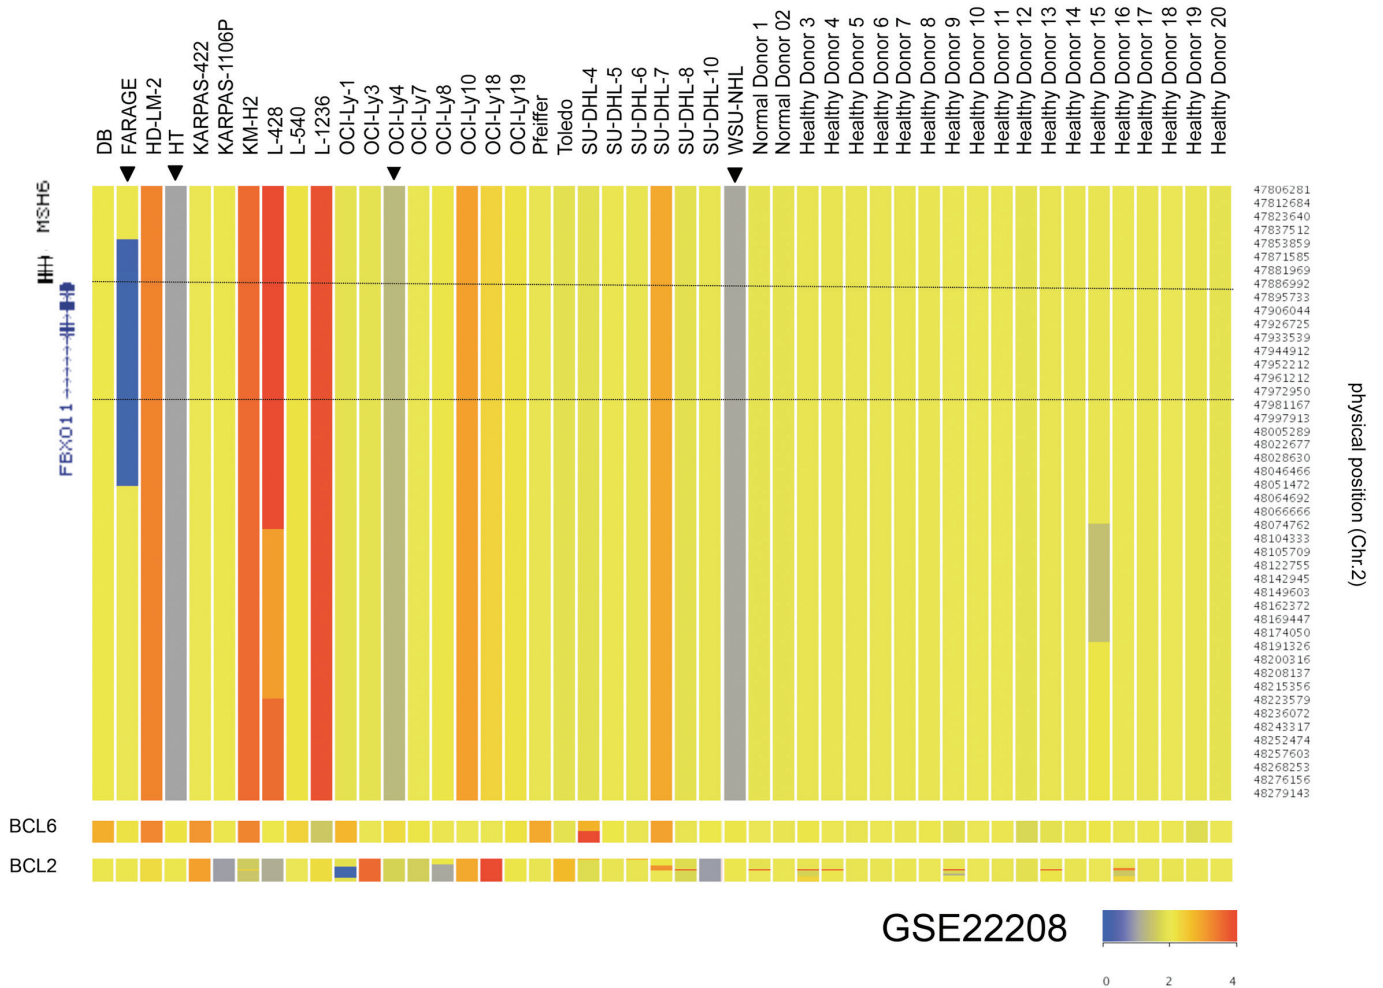

**Supplementary Figure 10. The *FBXO11* gene is deleted in DLBCL cell lines.**

Affymetrix Genome-Wide Human HD-SNP 6.0 array copy number data of the *FBXO11* locus in 27 DLBCL cell lines and 20 healthy donors is shown. The status of the *BCL6* and *BCL2* loci is also shown. The data are also accessible at the National Center for Biotechnology Information-Gene Expression Omnibus (NCBI-GEO; <http://www.ncbi.nlm.nih.gov/geo/>) database<sup>7</sup>, accession # GSE22208 (ref<sup>8</sup>).

a

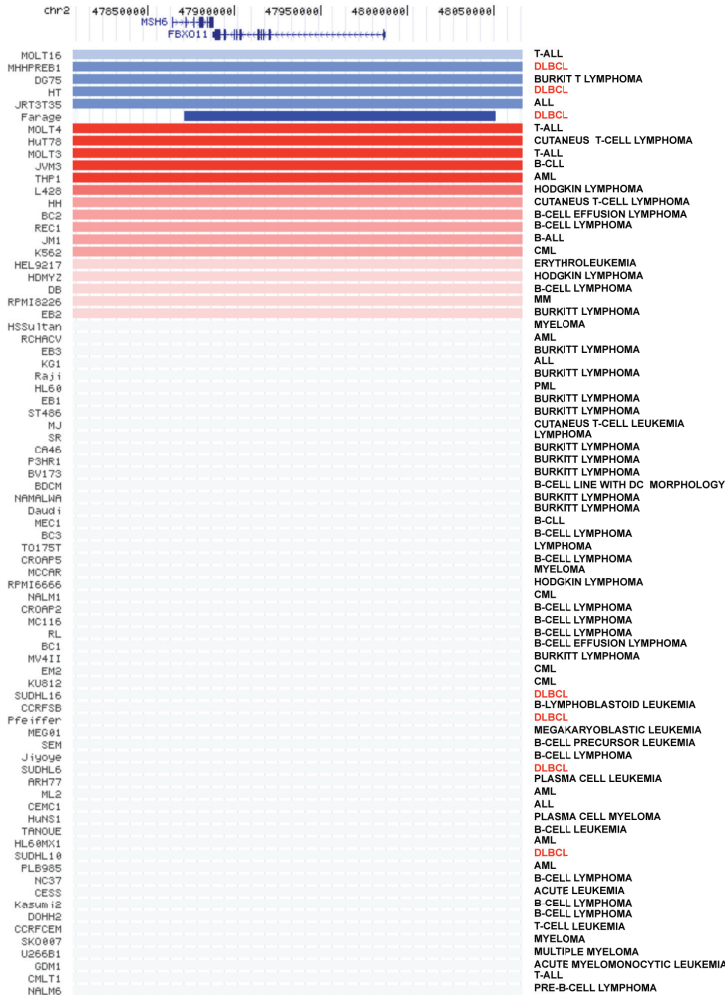

| TISSUE (CELL LINE ORIGIN) | SAMPLES #  | DEL.#         |
|---------------------------|------------|---------------|
| <b>HEMATOPOIETIC</b>      | <b>77</b>  | <b>6 (8%)</b> |
| - DLBCL                   | 7          | 3 (43%)       |
| <b>NON-HEMATOPOIETIC</b>  | <b>255</b> | <b>3 (1%)</b> |
| BLADDER                   | 10         | 0             |
| BRAIN                     | 7          | 1             |
| BREAST                    | 21         | 0             |
| CNS                       | 11         | 0             |
| CERVIX                    | 7          | 0             |
| COLON                     | 19         | 0             |
| CONNECTIVE T.             | 4          | 0             |
| ESOPHAGUS                 | 4          | 0             |
| EYE                       | 1          | 0             |
| KIDNEY                    | 8          | 0             |
| LIVER                     | 9          | 0             |
| LUNG                      | 81         | 1             |
| MUSCLE                    | 4          | 0             |
| OVARY                     | 7          | 0             |
| PANCREAS                  | 9          | 0             |
| PHARYNX                   | 2          | 0             |
| PLACENTA                  | 3          | 0             |
| PROSTATE                  | 6          | 1             |
| RECTUM                    | 2          | 0             |
| SARCOMA                   | 2          | 0             |
| SKIN                      | 12         | 0             |
| STOMACH                   | 5          | 0             |
| SYNOVIUM                  | 1          | 0             |
| THYROID                   | 4          | 0             |
| UTERUS                    | 9          | 0             |
| VULVA                     | 3          | 0             |

b

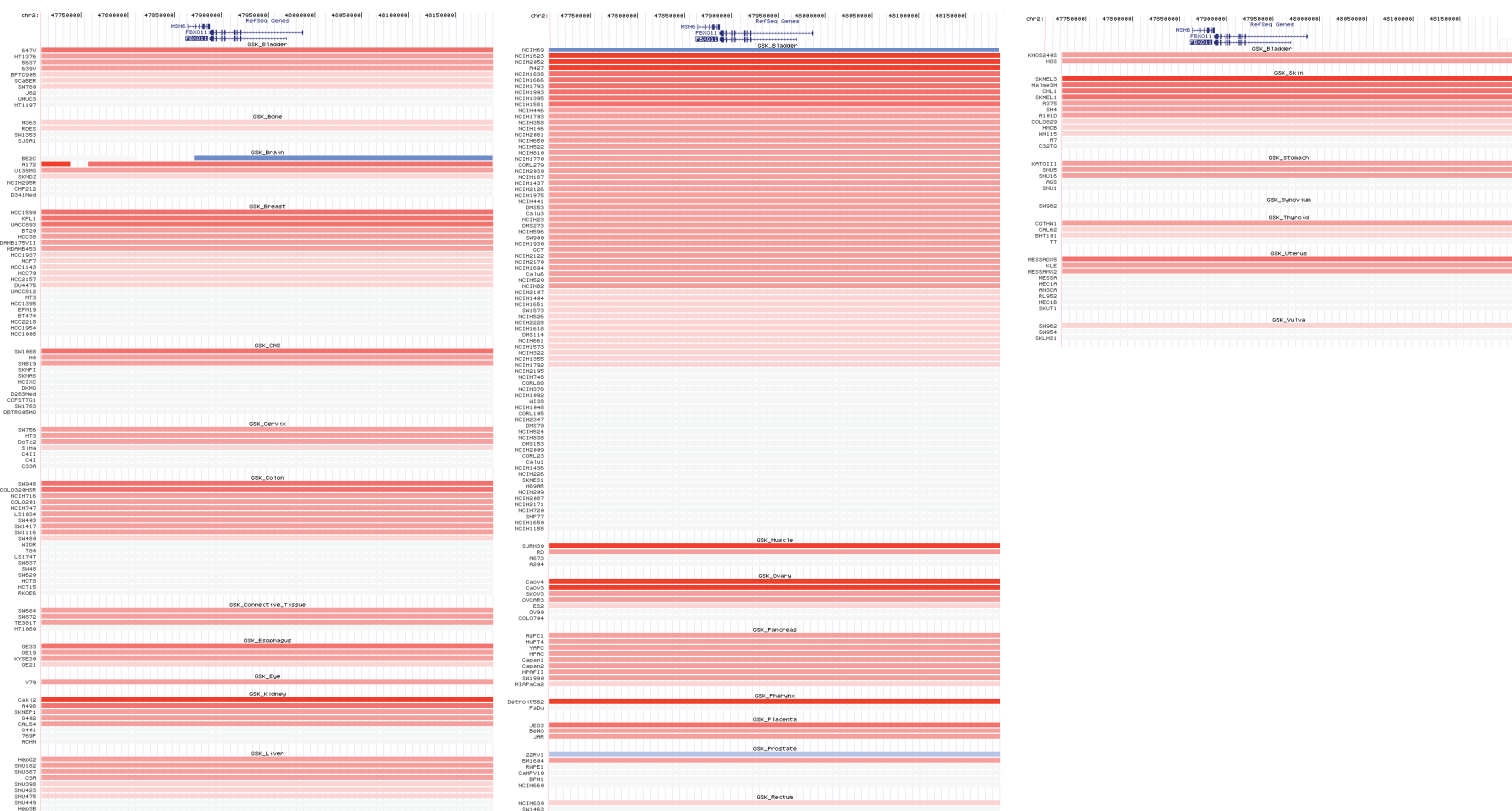

C

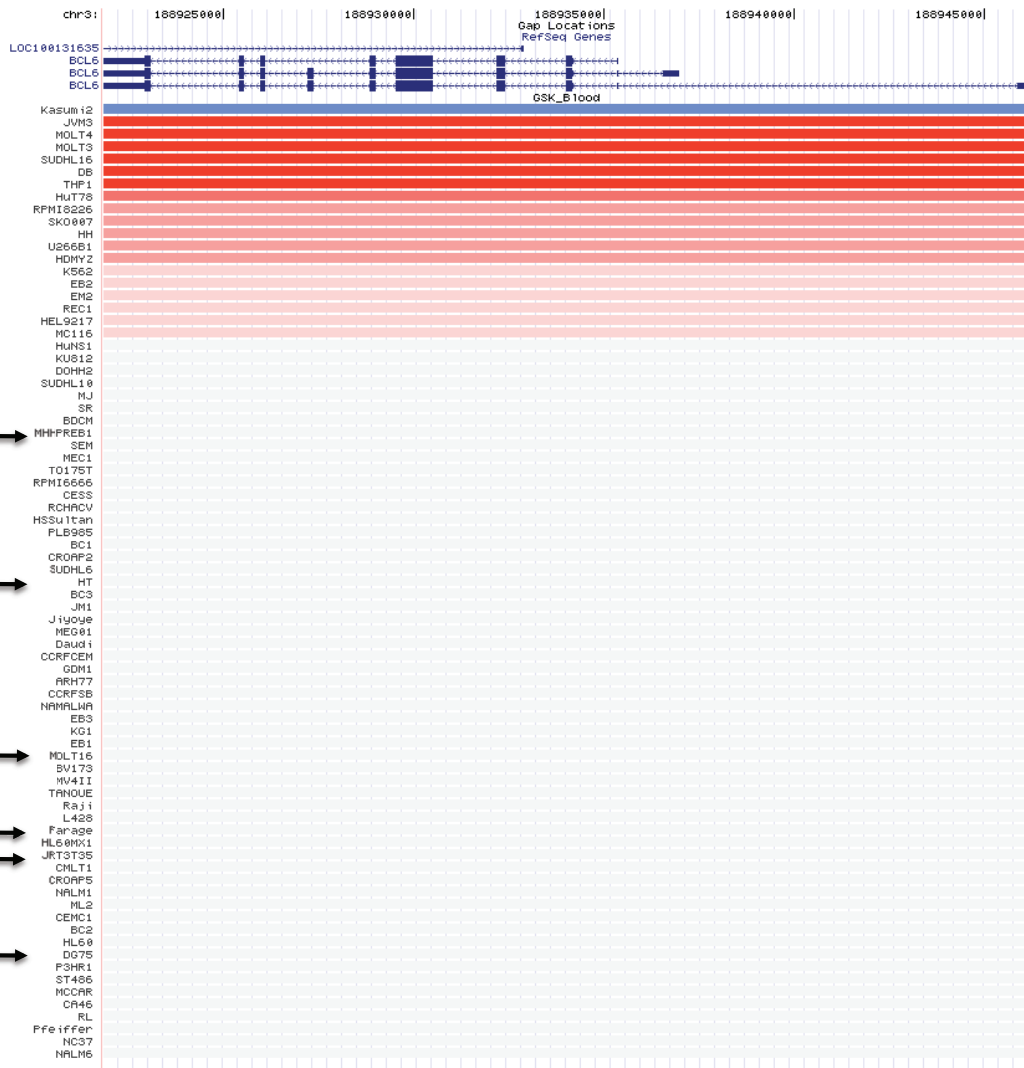



d

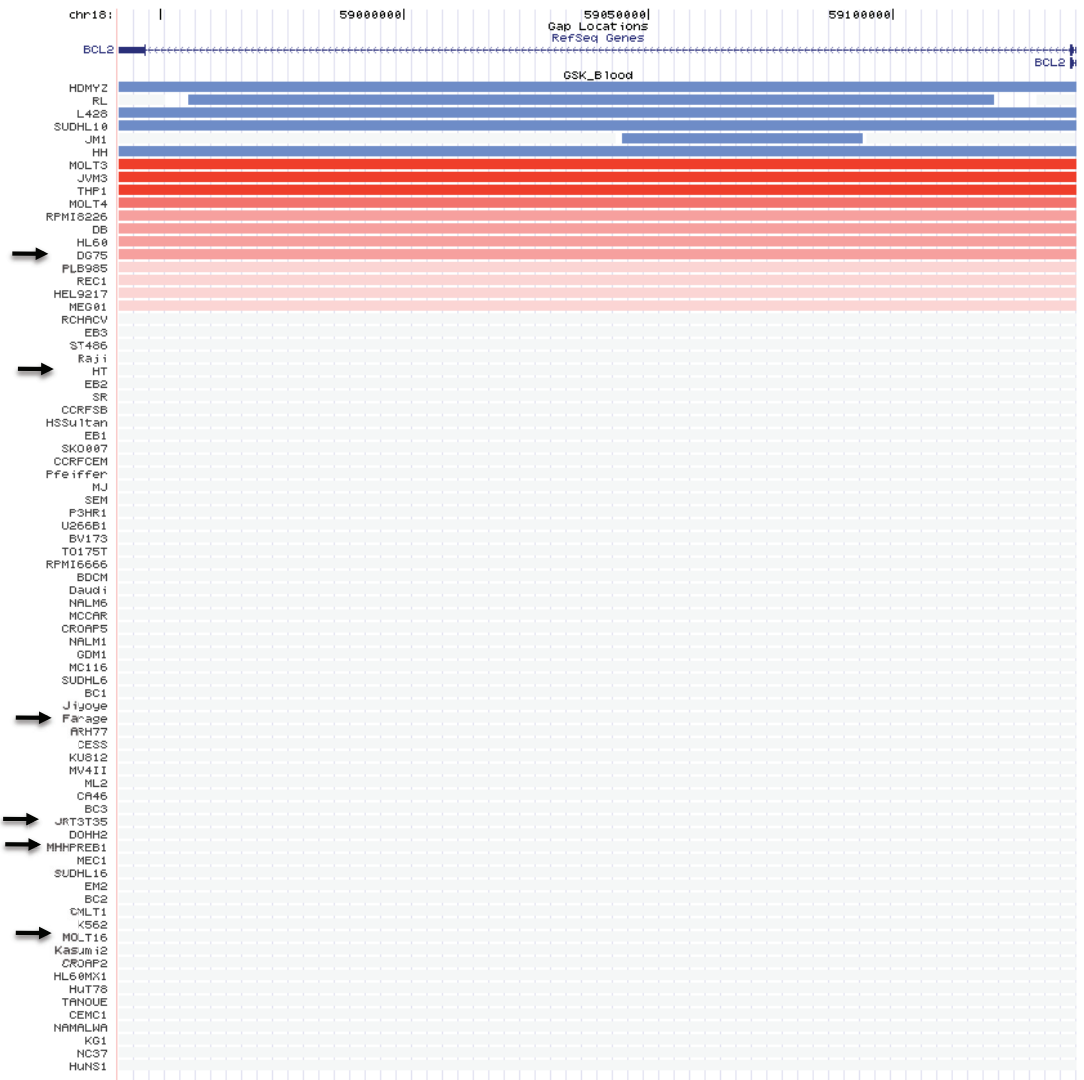

**Supplementary Figure 11. The *FBXO11* gene is deleted in hematopoietic cell lines more often than in other types of cell lines.**

**a,** A High-Density, Single Nucleotide Polymorphism (HD-SNP) inferred copy number heat map of the *FBXO11* locus in 77 hematopoietic cell lines is shown. The data were gathered from the GSK cancer cell line genomic profiling database ([https://cabig.nci.nih.gov/caArray\\_GSKdata/](https://cabig.nci.nih.gov/caArray_GSKdata/)) analyzed via the Cancer Genome Atlas data portal (<http://cancergenome.nih.gov/>). The table on the right summarizes the number of *FBXO11* deletions identified in 332 cell lines.

**b,** An HD-SNP inferred copy number heat map of the *FBXO11* locus in 255 non-hematopoietic cell lines (obtained from the same GSK database) is shown.

**c,** An HD-SNP inferred copy number heat map of the *BCL6* locus in 77 hematopoietic cell lines (obtained from the same GSK database) is shown. The arrows indicate cell lines with *FBXO11* deletions.

**d,** An HD-SNP inferred copy number heat map of the *BCL2* locus in 77 hematopoietic cell lines (obtained from the same GSK database) is shown. The arrows indicate cell lines with *FBXO11* deletions.

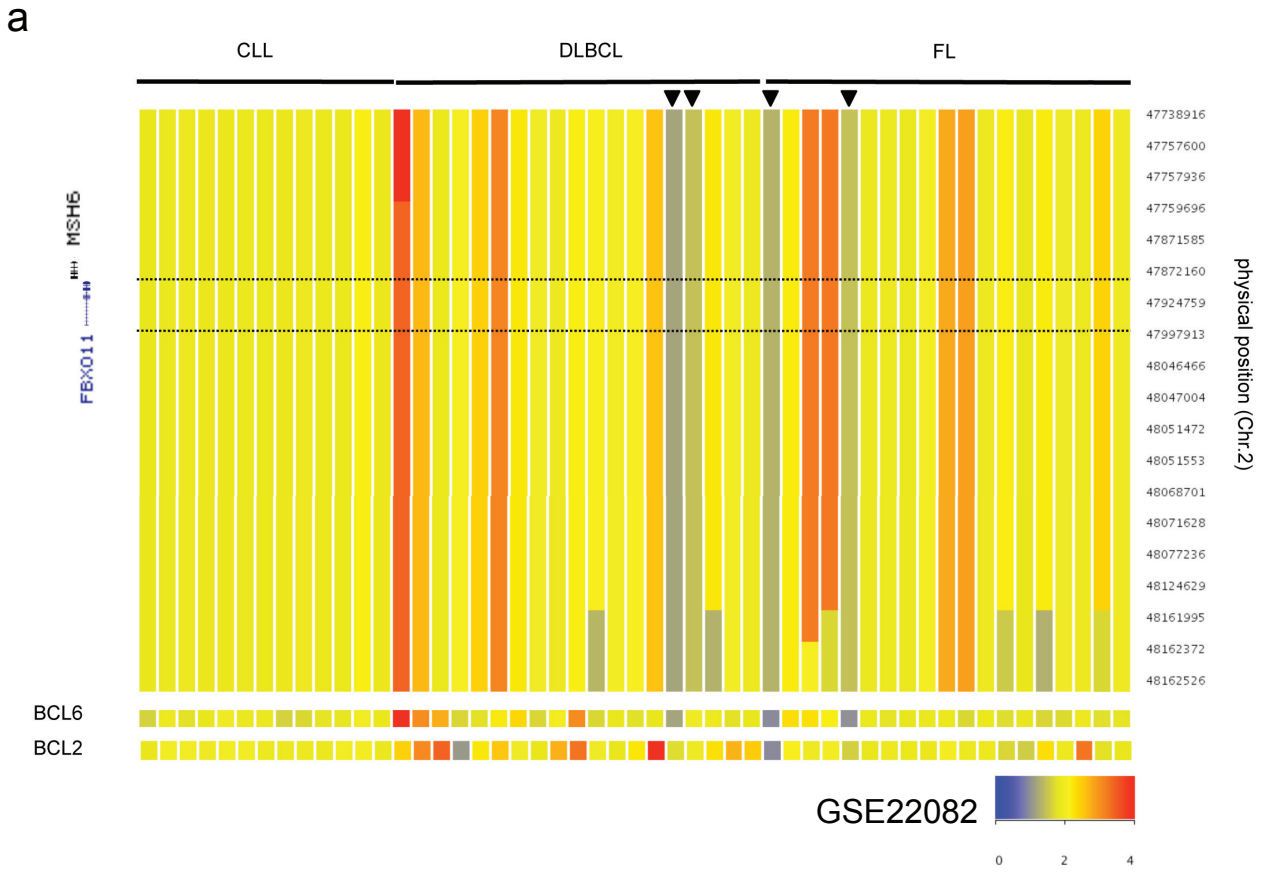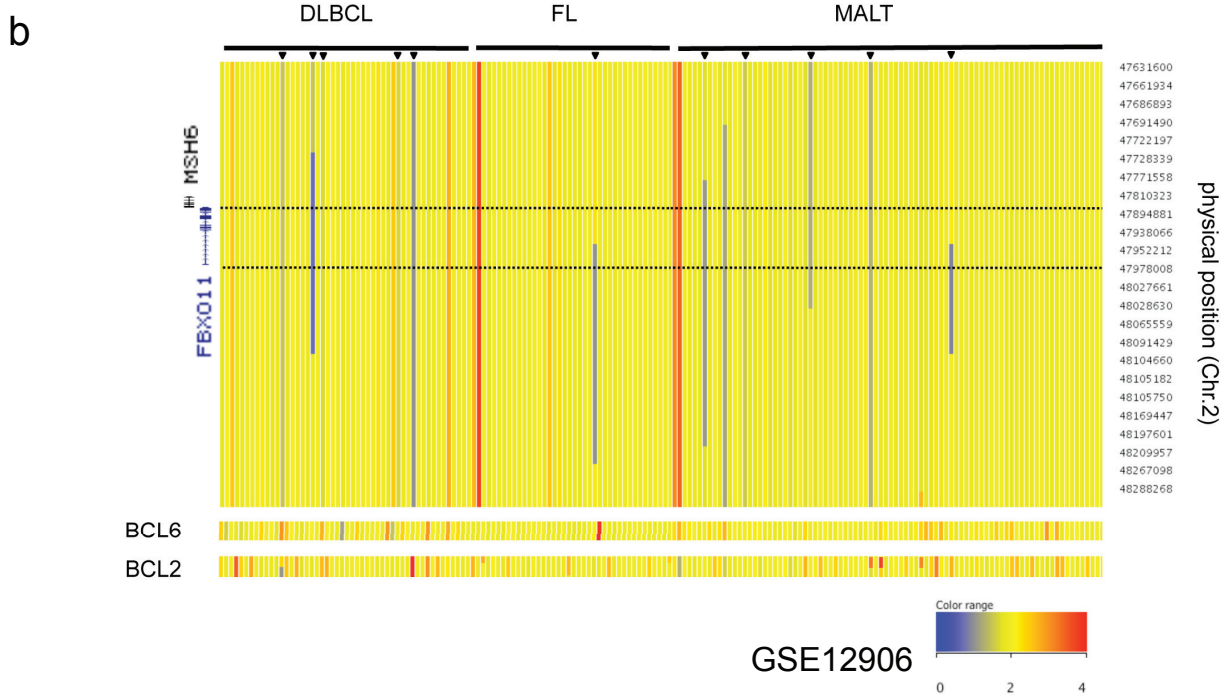

| DATASETS (GEO – DATABASE)    |        | GSE12906 |    |      | GSE22082 |       |       | GSE22208                       |
|------------------------------|--------|----------|----|------|----------|-------|-------|--------------------------------|
|                              | ORIGIN | DLBCL    | FL | MALT | CLL      | DLBCL | FL    | DLBCL CELL LINES (Shipp's Lab) |
| SAMPLE #                     |        | 50       | 39 | 84   | 13       | 19    | 19    | 27                             |
| DELETION IN FBXO11 LOCUS (#) |        | 4        | 1  | 6    | 0        | 2     | 2     | 4                              |
| DELETION IN FBXO11 LOCUS (%) |        | 8%       | 2% | 7%   | 0        | 10.5% | 10.5% | 14.8%                          |

**Supplementary Figure 12. The *FBXO11* gene is deleted in primary DLBCLs.**

**a**, Affymetrix 250K Sty HD-SNP array copy number data of the *FBXO11* locus in 13 Chronic Lymphocytic Leukemia (CLL) samples, 19 DLBCLs, and 19 Follicular Lymphomas (FL) is shown. The status of the *BCL6* and *BCL2* loci is also shown. Data are accessible at the NCBI-GEO database<sup>7</sup>, accession # GSE22082 (<sup>9</sup>).

**b**, Affymetrix 250K Nsp HD-SNP array copy number data of the *FBXO11* locus in 50 DLBCLs, 39 FLs, and 84 Mucosa-Associated Lymphoid Tissue lymphomas (MALTs) is shown. The status of the *BCL6* and *BCL2* loci is also shown. The data are accessible at the NCBI-GEO database<sup>7</sup>, accession # GSE12906 (ref <sup>10</sup>).

The table at the bottom summarizes the number of *FBXO11* deletions identified by the three studies reported in Supplementary Fig. 10 and 12.

a

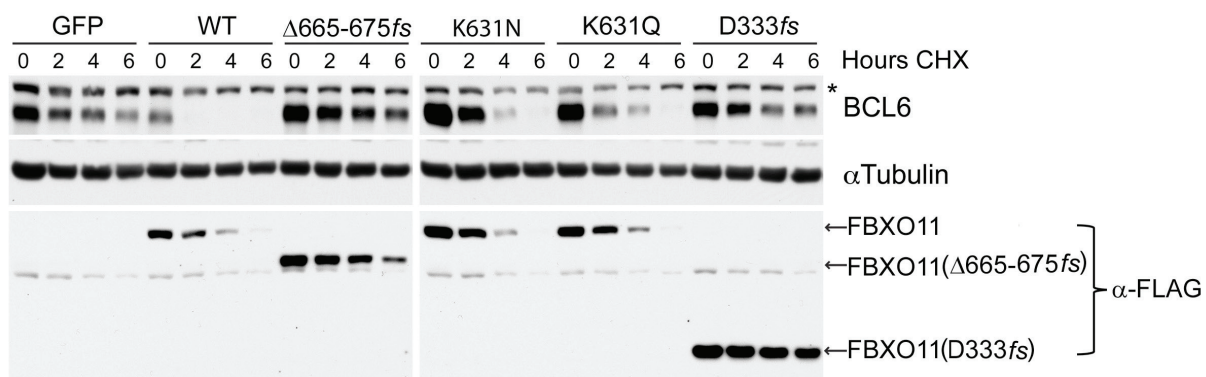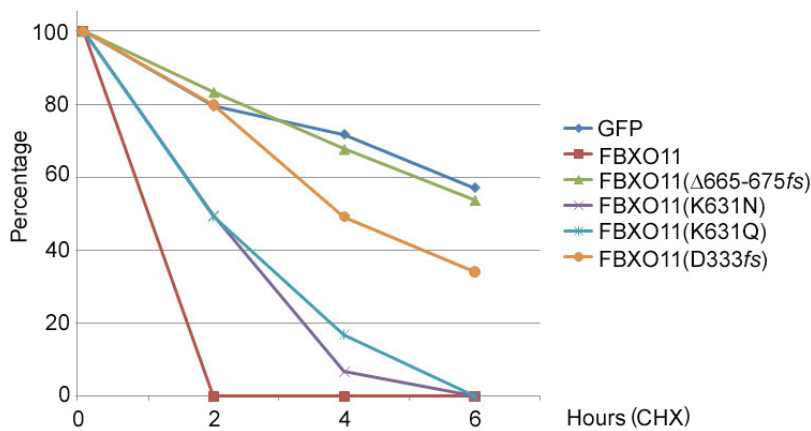

b

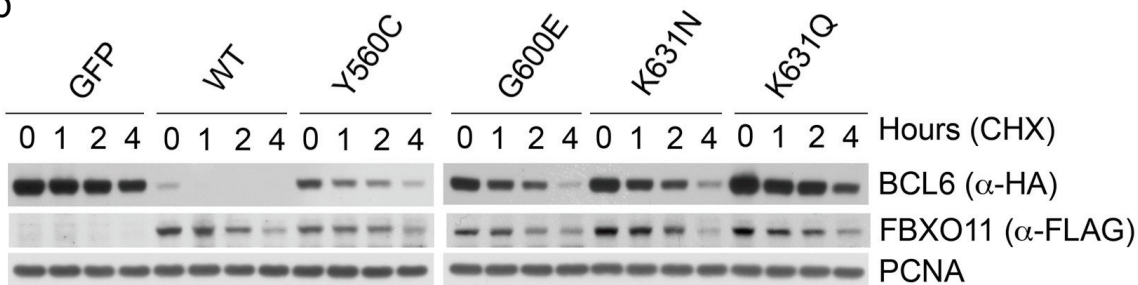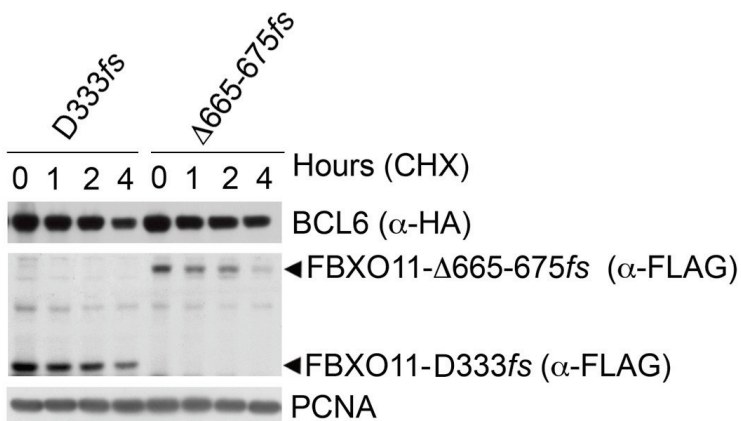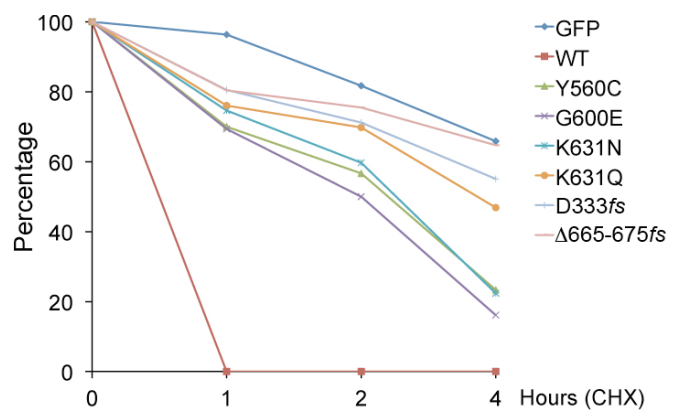

**Supplementary Figure 13. FBXO11 tumor-derived mutants have an impaired ability to induce BCL6 degradation.**

**a**, HEK-293T cells were transfected with BCL6 in combination with GFP, FLAG-tagged wild type (WT) FBXO11, or the indicated FLAG-tagged FBXO11 tumor-derived mutants. Twenty-four hours post-transfection, cells were treated with cycloheximide (CHX), and samples were harvested at the indicated time points for immunoblotting. The asterisks denote non-specific bands that are used for normalization. The graph shows the quantification of BCL6 over the time course. The intensity of the bands from the experiment shown in the upper blot was measured using Image-Pro Plus 6.0 software (Media Cybernetics). The ratio between the relative levels of BCL6 and  $\alpha$ -Tubulin in each time 0 was set as 100%.

**b**, HEK-293T cells were transfected with BCL6 in combination with GFP, FLAG-tagged wild type (WT) FBXO11, or the indicated FLAG-tagged FBXO11 tumor-derived mutants. Twenty-four hours post-transfection, cells were treated with cycloheximide (CHX), and samples were harvested at the indicated time points for immunoblotting. The graph shows the quantification of BCL6 over the time course. The intensity of the bands from the experiment shown was measured using Image-Pro Plus 6.0 software (Media Cybernetics). The ratio between the relative levels of BCL6 and PCNA in each time 0 was set as 100%.

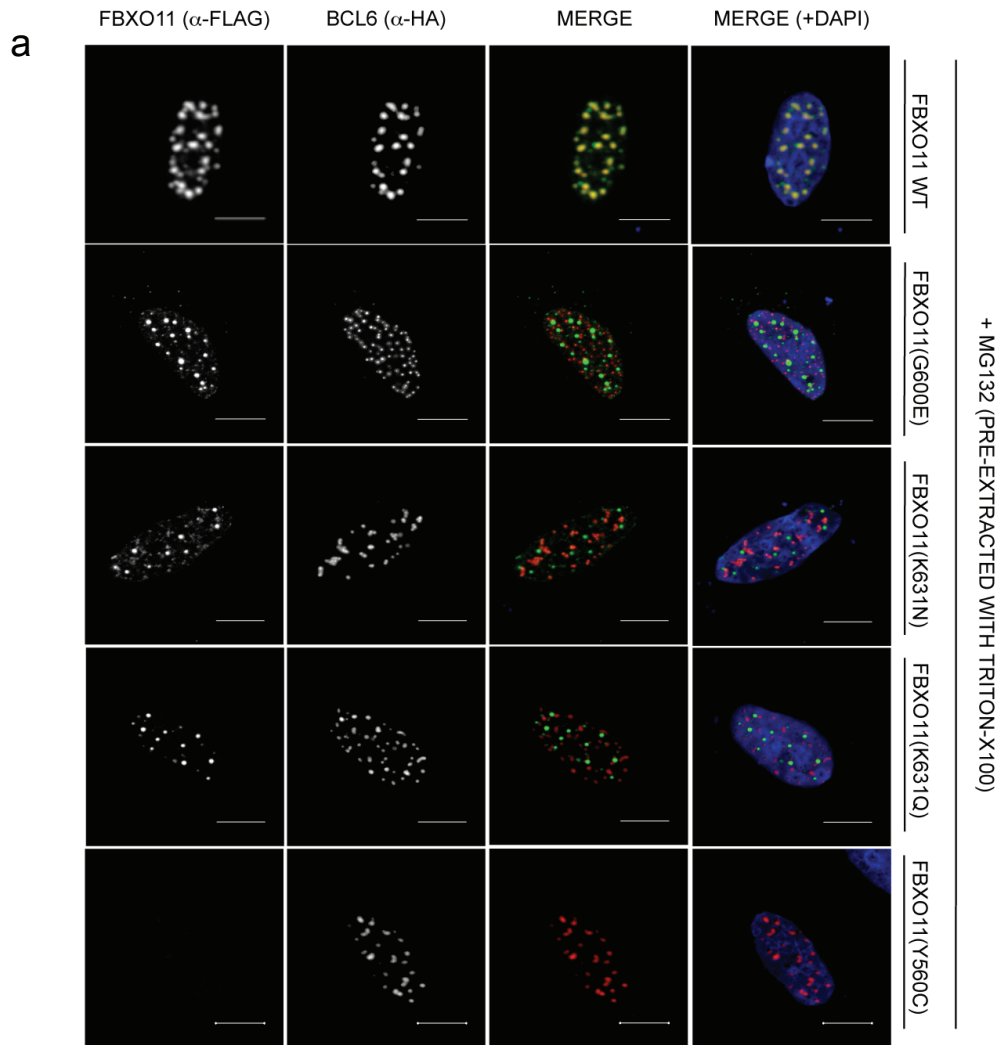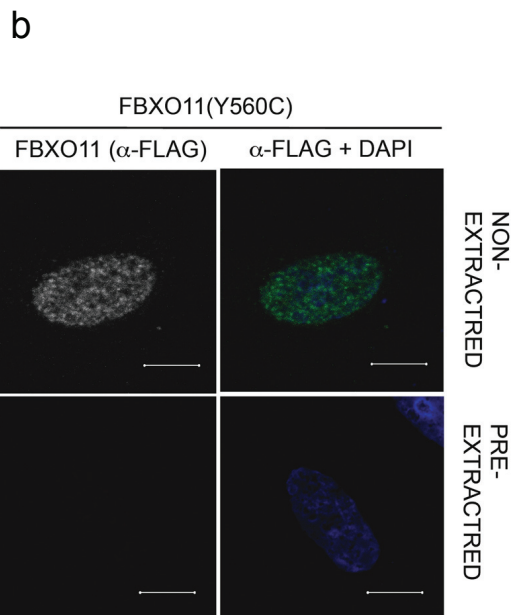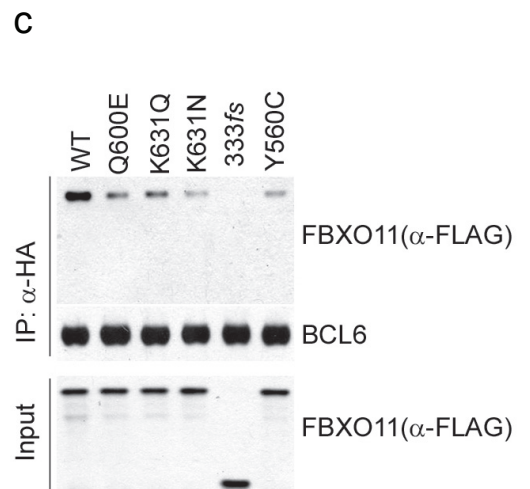

**Supplementary Figure 14. Tumor-derived FBXO11 mutants do not colocalize with BCL6 and bind BCL6 less efficiently than wild type FBXO11.**

**a**, U-2 OS cells were transfected with HA-tagged BCL6 and either FLAG-tagged wild type (WT) FBXO11 or the indicated FLAG-tagged FBXO11 tumor-derived mutant. Twenty-four hours after transfection, cells were incubated with MG132 for four hours, pre-extracted with 0.5% Triton-X100, and immunostained as indicated. In the merged image, yellow shows colocalization of FBXO11 and BCL6. FBXO11(Y560C) was not detected because the Y560C mutation makes FBXO11 Triton-soluble, as shown in *b*.

**b**, U-2 OS cells were transfected with FLAG-tagged FBXO11(Y560C). Twenty-four hours after transfection, cells were incubated with MG132 for four hours and immunostained as indicated. Soluble nuclear proteins in the cells shown in the bottom panels were pre-extracted with 0.5% Triton-X100 prior to immunostaining. In the merged image, yellow shows colocalization of FBXO11 and BCL6. FBXO11(Y560C) was only detected in non-extracted cells, indicating that the Y560C mutation makes FBXO11 Triton-soluble.

**c**, HEK-293T cells were transfected with BCL6 in combination with GFP, FLAG-tagged wild type (WT) FBXO11, or the indicated FLAG-tagged FBXO11 tumor-derived mutants. Twenty-four hours after transfection, cells were harvested and lysed. Whole cell extracts (WCE) were subjected to immunoprecipitation (IP) with anti-HA resin ( $\alpha$ -HA) and immunoblotting as indicated.



| Case # | Year | Age | Gender | Location           | Diagnosis     | Previous lymphoma | Sample origin         | clonality          | BCL2 rear. | CD10 | MUM1/IRF4 | BCL6 | TYPE |
|--------|------|-----|--------|--------------------|---------------|-------------------|-----------------------|--------------------|------------|------|-----------|------|------|
| 1      | 2008 | 56  | M      | Stomach            | DLBCL         |                   | Esophagus + Liver     | Clonal FR3         | -          | +    | +         | ND   | GCB  |
| 2      | 2008 | 81  | F      | Subcutaneous       | DLBCL         |                   | LN                    | Polyclonal FR2     | +          | -    | +         | -    | ABC  |
| 3      | 2008 | 69  | M      | Spleen             | DLBCL         |                   | Spleen                | Clonal FR3         | -          | -    | +         | +    | ABC  |
| 4      | 2008 | 68  | F      | Inguinal LN        | DLBCL         |                   | LN                    | Clonal FR3         | +          | -    | +         | +    | ABC  |
| 5      | 2008 | 67  | M      | Spleen             | DLBCL         |                   | Spleen                | Clonal FR2         | -          | -    | +         | -    | ABC  |
| 6      | 2008 | 75  | M      | Axillary LN        | DLBCL         |                   | LN                    | ND                 | ND         | -    | +         | -    | ABC  |
| 7      | 2008 | 74  | M      | Axillary LN        | DLBCL         |                   | LN                    | Clonal FR2         | -          | -    | +         | +    | ABC  |
| 8      | 2008 | 50  | M      | Cervical LN        | DLBCL         |                   | LN                    | Clonal FR2         | -          | -    | +         | +    | ABC  |
| 9      | 2008 | 52  | M      | Ileal LN           | DLBCL         |                   | LN                    | Clonal FR3         | +          | +    | -         | +    | GCB  |
| 10     | 2008 | 93  | F      | Cervical LN        | DLBCL         |                   | LN                    | Clonal FR2         | -          | +    | -         | +    | GCB  |
| 11     | 2008 | 53  | M      | Axillary LN        | DLBCL         |                   | LN                    | Clonal FR3         | -          | -    | +         | -    | ABC  |
| 12     | 2008 | 29  | M      | Axillary LN        | DLBCL         |                   | LN                    | Polyclonal FR2     | -          | -    | -         | +    | GCB  |
| 13     | 2008 | 79  | M      | Inguinal LN        | DLBCL         | GL (1999)         | LN                    | Clonal FR2         | -          | -    | +         | -    | ABC  |
| 14     | 2008 | 76  | F      | Mesenteric LN      | DLBCL         |                   | OMENTUM               | Clonal FR3         | -          | +    | +         | +    | GCB  |
| 15     | 2008 | 83  | F      | Spleen             | DLBCL         |                   | LN                    | Clonal FR2         | ND         | -    | +         | +    | ABC  |
| 16     | 2008 | 54  | M      | Axillary LN        | DLBCL         | CL (2007)         | LN                    | Polyclonal FR2     | -          | -    | -         | +    | GCB  |
| 17     | 2008 | 22  | M      | large bowel        | DLBCL         |                   | Small intestine       | Clonal FR3         | -          | +    | -         | +    | GCB  |
| 18     | 2008 | 73  | F      | Cervical LN        | DLBCL         |                   | LN                    | Polyclonal FR2     | -          | -    | +         | -    | ABC  |
| 19     | 2008 | 58  | M      | Abdominal mass     | DLBCL         |                   | Abnomal Mass          | Clonal FR2         | -          | +    | -         | +    | GCB  |
| 20     | 2008 | 62  | M      | Axillary LN        | DLBCL         |                   | LN                    | Clonal FR2         | +          | -    | -         | +    | GCB  |
| 21     | 2008 | 55  | M      | Inguinal mass      | DLBCL         |                   | Inguinal mass         | Clonal FR2         | -          | -    | -         | +    | GCB  |
| 22     | 2008 | 80  | M      | Tibial mass        | DLBCL         |                   | Pretibial Mass        | Clonal FR2         | -          | -    | +         | +    | ABC  |
| 23     | 2008 | 53  | M      | Cervical LN        | DLBCL         |                   | LN                    | Clonal FR3         | -          | -    | +         | +    | ABC  |
| 24     | 2008 | 72  | M      | Axillary LN        | DLBCL         |                   | LN                    | Clonal FR2         | -          | +    | -         | +    | GCB  |
| 25     | 2008 | 71  | F      | Axillary LN        | DLBCL         |                   | LN                    | Clonal FR2         | ND         | -    | ND        | -    | ABC  |
| 26     | 2008 | 69  | F      | Spleen             | DLBCL         |                   | Spleen                | Clonal FR2         | -          | -    | ND        | ND   | ND   |
| 27     | 2008 | 72  | M      | Cervical LN        | DLBCL         |                   | Lateral Cervical Node | Clonal FR2         | -          | -    | ND        | ND   | ND   |
| 28     | 2008 | 64  | F      | Mesenteric LN      | DLBCL         |                   | LN                    | Clonal FR2         | -          | -    | +         | ND   | ABC  |
| 29     | 2008 | 50  | F      | Pharyngeal mass    | DLBCL         | HL (2002)         | Pharynx Mass          | Clonal FR2         | ND         | -    | +         | +    | ABC  |
| 30     | 2008 | 52  | F      | Supraclavicular LN | DLBCL         |                   | LN                    | Clonal FR2         | -          | +    | -         | +    | GCB  |
| 31     | 2009 | 45  | M      | Axillary LN        | DLBCL         |                   | LN                    | Clonal FR2         | +          | +    | -         | +    | GCB  |
| 32     | 2009 | 80  | M      | Inguinal LN        | DLBCL         |                   | LN                    | Clonal FR2         | -          | -    | +         | ND   | ABC  |
| 33     | 2009 | 75  | M      | Cervical LN        | DLBCL         |                   | LN                    | Clonal FR3         | +          | +    | +         | +    | GCB  |
| 34     | 2009 | 72  | F      | aortic mass        | DLBCL         |                   |                       | Polyclonal FR2     | -          | -    | -         | +    | ABC  |
| 35     | 2009 | 71  | F      | Supraclavicular LN | DLBCL         |                   | LN                    | Clonal FR2         | +          | +    | ND        | +    | GCB  |
| 36     | 2009 | 69  | F      | Supraclavicular LN | DLBCL         |                   | LN                    | Clonal FR2         | +          | +    | +         | +    | ABC  |
| 37     | 2009 | 75  | M      | Spleen             | DLBCL         |                   | Spleen                | Clonal FR2         | +          | +    | -         | +    | GCB  |
| 38     | 2009 | 55  | F      | Abdominal mass     | DLBCL         |                   | Abnomal Mass          | Clonal FR3         | -          | -    | +         | -    | ABC  |
| 39     | 2009 | 76  | F      | Inguinal LN        | DLBCL         |                   | LN                    | Clonal FR2         | -          | +    | +         | +    | GCB  |
| 40     | 2009 | 25  | F      | Small intestine    | DLBCL         |                   | jejunum               | Clonal FR2         | ND         | +    | ND        | ND   | GCB  |
| 41     | 2009 | 72  | M      | Lung mass          | DLBCL         | MZL (2001)        | LN                    | Clonal FR2         | -          | -    | +         | -    | ABC  |
| 42     | 2009 | 62  | F      | Small intestine    | DLBCL         |                   | jejunum               | Clonal FR3         | -          | -    | +         | +    | ABC  |
| 43     | 2009 | 74  | F      | Abdominal mass     | DLBCL         |                   | Peritoneal Nodes      | Clonal FR2         | -          | +    | -         | ND   | GCB  |
| 44     | 2009 | 56  | M      | Inguinal LN        | DLBCL         |                   | LN                    | Clonal FR2         | -          | +    | -         | +    | GCB  |
| 45     | 2009 | 60  | M      | Vertebral mass     | DLBCL         |                   | Incisional Biopsy     | Clonal FR2         | -          | +    | -         | +    | GCB  |
| 46     | 2009 | 89  | F      | Inguinal LN        | DLBCL         |                   | LN                    | Clonal FR2         | -          | +    | +         | +    | GCB  |
| 47     | 2009 | 64  | F      | Axillary LN        | DLBCL         |                   | LN                    | Clonal FR3         | -          | -    | -         | -    | ND   |
| 48     | 2009 | 70  | M      | Inguinal LN        | DLBCL         |                   | LN                    | Clonal FR2         | -          | +    | +         | +    | GCB  |
| 49     | 2009 | 72  | M      | Unspecified LN     | DLBCL         |                   | LN                    | Clonal FR3         | -          | -    | +         | -    | ABC  |
| 50     | 2009 | 72  | F      | Inguinal LN        | DLBCL         |                   | LN                    | Clonal FR3         | -          | -    | +         | +    | ABC  |
| 51     | 2009 | 70  | F      | Cervical LN        | DLBCL         |                   | LN                    | Clonal FR2         | -          | +    | +         | +    | GCB  |
| 52     | 2009 | 85  | M      | Abdominal mass     | DLBCL         |                   | LN                    | Clonal FR3         | -          | -    | +         | -    | ABC  |
| 53     | 2010 | 70  | M      | Supraclavicular LN | DLBCL         |                   | LN                    | Polyclonal FR2     | -          | -    | +         | +    | ABC  |
| 54     | 2010 | 54  | M      | Supraclavicular LN | DLBCL         |                   | LN                    | Clonal FR3         | -          | -    | +         | +    | ABC  |
| 55     | 2010 | 62  | F      | Inguinal LN        | DLBCL         |                   | LN                    | Clonal FR2         | -          | +    | +         | ND   | GCB  |
| 56     | 2010 | 71  | M      | Cervical LN        | DLBCL         |                   | LN                    | Clonal FR2         | -          | -    | +         | +    | ABC  |
| 57     | 2010 | 81  | M      | Supraclavicular LN | DLBCL         |                   | LN                    | Clonal FR3         | -          | -    | +         | +    | ABC  |
| 58     | 2010 | 53  | F      | Cervical LN        | DLBCL         | FL (2000)         | LN                    | ND                 | +          | -    | -         | +    | GCB  |
| 59     | 2010 | 62  | F      | Cervical LN        | DLBCL         |                   | LN                    | Clonal FR2         | ND         | -    | +         | +    | ABC  |
| 60     | 2010 | 83  | M      | Axillary LN        | DLBCL         |                   | LN                    | Clonal FR2         | -          | -    | -         | -    | ND   |
| 61     | 2010 | 61  | M      | Inguinal LN        | DLBCL         |                   | LN                    | Clonal FR2         | -          | -    | ND        | +    | ND   |
| 62     | 2010 | 69  | M      | Cervical LN        | DLBCL         |                   | LN                    | Clonal FR1 FR2 FR3 | -          | -    | +         | +    | ABC  |
| 63     | 2010 | 57  | M      | Supraclavicular LN | DLBCL         |                   | LN                    | Clonal FR1 FR2 FR3 | +          | -    | +         | +    | ABC  |
| 64     | 2010 | 71  | F      | Stomach            | DLBCL         |                   | Stomach               | Clonal FR1 FR2 FR3 | +          | -    | +         | +    | ABC  |
| 65     | 2010 | 63  | F      | Skin               | DLBCL         |                   | LN                    | Clonal FR2         | ND         | -    | +         | ND   | ABC  |
| 66     | 2010 | 63  | M      | Inguinal LN        | DLBCL         |                   | LN                    | Clonal FR1 FR2 FR3 | -          | +    | ND        | +    | GCB  |
| 67     | 2005 | 70  | M      | Lung mass          | DLBCL         |                   | Lung biopsy           | Clonal FR2         | -          | +    | ND        | ND   | GCB  |
| 68     | 2006 | 66  | F      | Axillary LN        | DLBCL         |                   | Axillary Mass         | Clonal FR2         | +          | -    | +         | ND   | ABC  |
| 69     | 2005 | 50  | M      | Spleen             | DLBCL         |                   | Spleen                | Clonal FR3         | +          | -    | ND        | -    | ABC  |
| 70     | 2006 | 79  | F      | Cervical LN        | DLBCL         |                   | LN                    | Clonal FR3         | -          | -    | +         | +    | ABC  |
| 71     | 2006 | 83  | F      | Axillary LN        | DLBCL         |                   | LN                    | Clonal FR3         | -          | -    | ND        | ND   | ND   |
| 72     | 2006 | 66  | M      | Cervical LN        | DLBCL         |                   | LN                    | Clonal FR2         | -          | -    | +         | -    | ABC  |
| 73     | 2005 | 44  | F      | Crural mass        | DLBCL         |                   | LN                    | Clonal FR2         | ND         | +    | +         | +    | GCB  |
| 74     | 2006 | 50  | M      | Cervical LN        | DLBCL         | CLL (2004)        | LN                    | Clonal FR3         | -          | -    | ND        | ND   | ND   |
| 75     | 2006 | 28  | M      | Inguinal LN        | DLBCL         |                   | LN                    | Clonal FR3         | -          | +    | ND        | +    | GCB  |
| 76     | 2006 | 75  | F      | Axillary LN        | DLBCL         |                   | LN                    | Clonal FR2         | -          | -    | ND        | ND   | ND   |
| 77     | 2006 | 76  | F      | Mediastinal LN     | DLBCL         | IL (2001)         | LN                    | Clonal FR2         | ND         | -    | ND        | ND   | ND   |
| 78     | 2006 | 49  | F      | Cervical LN        | DLBCL         |                   | Lateral Cervical Node | Clonal FR3         | -          | -    | ND        | ND   | ND   |
| 79     | 2006 | 80  | M      | Supraclavicular LN | DLBCL         |                   | LN                    | Clonal FR3         | -          | -    | +         | -    | ABC  |
| 80     | 2006 | 80  | F      | Inguinal LN        | DLBCL         |                   | LN                    | Clonal FR2         | -          | -    | +         | +    | ABC  |
| 81     | 2006 | 68  | F      | Supraclavicular LN | DLBCL         |                   | LN                    | Polyclonal FR2     | -          | -    | +         | +    | ABC  |
| 82     | 2005 | 64  | F      | Cervical LN        | DLBCL         |                   | Abdominal Mass        | Clonal FR2         | +          | -    | +         | +    | ABC  |
| 83     | 2006 | 67  | M      | Inguinal LN        | DLBCL         |                   | LN                    | Clonal FR2         | -          | -    | ND        | ND   | ND   |
| 84     | 2006 | 71  | F      | Supraclavicular LN | DLBCL         |                   | LN                    | Clonal FR2         | -          | +    | ND        | +    | GCB  |
| 85     | 2006 | 75  | F      | Axillary LN        | DLBCL         | DLBCL (2000)      | LN                    | Clonal FR2         | -          | -    | +         | -    | ABC  |
| 86     | 2005 | 61  | M      | Abdominal mass     | DLBCL         |                   | Retropertoneal Mass   | Clonal FR2         | +          | +    | ND        | +    | GCB  |
| 87     | 2006 | 53  | M      | Spleen             | DLBCL         |                   | Spleen                | Clonal FR3         | ND         | -    | ND        | ND   | ND   |
| 88     | 2005 | 52  | M      | Inguinal LN        | DLBCL         |                   | LN                    | Polyclonal FR2     | -          | -    | +         | -    | ABC  |
| 89     | 2006 | 77  | F      | Spleen             | DLBCL         |                   | Spleen                | Clonal FR2         | -          | -    | +         | +    | ABC  |
| 90     | 2006 | 44  | F      | Axillary LN        | DLBCL         |                   | LN                    | ND                 | ND         | +    | +         | +    | GCB  |
| 91     | 2006 | 49  | M      | Abdominal mass     | DLBCL         |                   | LN                    | Clonal FR2         | ND         | -    | +         | +    | ABC  |
| 92     | 2006 | 48  | F      | Axillary LN        | DLBCL         |                   | LN                    | Clonal FR2         | -          | -    | +         | +    | ABC  |
| 93     | 2006 | 69  | F      | Supraclavicular LN | DLBCL         |                   | LN                    | Clonal FR3         | ND         | -    | +         | +    | ABC  |
| 94     | 2010 | 50  | F      | Cervical LN        | DLBCL w/FL c  |                   | Bulk Mass             | Clonal FR2         | -          | +    | ND        | +    | GCB  |
| 95     | 2010 | 37  | F      | Axillary LN        | DLBCL w/FL c  |                   | LN                    | Polyclonal FR2     | +          | +    | -         | +    | GCB  |
| 96     | 2010 | 50  | F      | Cervical LN        | DLBCL         | MZL (2010)        | LN                    | Clonal FR3         | ND         | -    | +         | -    | ABC  |
| 97     | 2010 | 38  | F      | Cervical LN        | DLBCL w/MZL c |                   | LN                    | Clonal FR3         | ND         | -    | +         | -    | ABC  |
| 98     | 2010 | 72  | F      | Thyroid gland      | DLBCL         |                   | Thyroid Nodule        | Clonal FR3         | -          | +    | +         | +    | GCB  |
| 99     | 2010 | 60  | M      | Skin               | DLBCL         |                   | LN                    | Clonal FR3         | +          | +    | ND        | +    | GCB  |
| 100    | 2010 | 76  | M      | inguinal LN        | DLBCL         |                   | LN                    | Clonal FR3         | -          | -    | +         | +    | ABC  |

**Supplementary Table 1**

Genomic DNA from 100 DLBCL patients was obtained from the archives of the Department of Biomedical Sciences and Human Oncology of the University of Torino and San Giovanni Battista Hospital (Turin, Italy) after approval by the Institutional Review Board. DLBCL lymphoma patients are listed according to clinical features (sex, age, and site of origin), clonality of the Immunoglobulin heavy chain gene (*IgH*), and *BCL2-IgH* gene rearrangements by PCR using a PCR technique that amplifies the major breakpoint region site of the *BCL2* gene. Of the 100 samples analyzed, 87 were primary DLBCLs and 13 were relapses or transformations of a previous lymphoma. DLBCLs were stratified into Germinal Center (GCB)- or Activated B-cell (ABC)-type by immunohistochemistry with antibodies to CD10, BCL6, and MUM1/IRF4, according to the classification proposed by Hans *et al.*<sup>11</sup>. Abbreviations: GL (Gastric Lymphoma), CL (Cutaneous Lymphoma), HL (Hodgkin Lymphoma), FL (Follicular lymphoma), MZL (Marginal Zone Lymphoma), CLL (Chronic Lymphoblastic Lymphoma), IL (Immunoblastic Lymphoma), LN (Lymph Node), DLBCL w/FL c (DLBCL with FL component), DLBCL w/MZL c (DLBCL with MZL component), ND (Not Determined).

| cell line/tumor sample | changes in the BCL6 locus                   |
|------------------------|---------------------------------------------|
| OCI-LY1                | gain in 3q21-3q29 and one mutation in BSE1* |
| FARAGE                 | no translocations and no mutations in BSE1  |
| HT                     | no translocations and no mutations in BSE1  |
| MHHPREB1               | no translocations and no mutations in BSE1  |
| CASE#15                | no translocations and no mutations in BSE1  |
| CASE#21                | no translocations and no mutations in BSE1  |
| CASE#30                | no translocations or mutations in BSE1      |
| CASE#95                | no translocations and no mutations in BSE1  |

### Supplementary Table 2

Cell lines and DLBCL samples with *FBXO11* dysregulation were analyzed for *BCL6* translocations (using FISH) and mutations in the *BCL6* promoter [BCL6 binding site in exon 1 (BSE1)], which makes *BCL6* insensitive to its negative autoregulation<sup>12,13</sup>. The only cases in which *BCL6* and *FBXO11* dysregulation coexist is in OCI-LY1 cells, in which we found one mutation in the BSE1 motif (TTC to TCC in position +256-258 from the *BCL6* promoter), as previously reported for this cell line<sup>12,13</sup>. Moreover, OCI-LY1 cells have an extra copy of *BCL6*. Although the co-occurrence of *BCL6* and *FBXO11* alterations in the same cell line may seem counterintuitive, cooperation between two independent genetic events is consistent with previous observations. For example, in Burkitt's and other lymphomas, high levels of c-Myc are achieved via both increased transcription (due to translocations of the *c-myc* gene to the immunoglobulin loci) and escape from ubiquitin-mediated degradation (through mutation of the c-Myc phosphodegron)<sup>14,15</sup>. Similarly, mutations in *Huwe1*, encoding an ubiquitin ligase targeting N-Myc, coexist with *N-myc* gene amplification in human glioblastomas<sup>16</sup>. Because oncoproteins often display short half-lives, their accumulation in tumor cells may require both increased synthesis and stabilization by a secondary event (*i.e.* mutation of the degron or an independent loss of the gene encoding their ubiquitin ligase).

**PRIMERS FOR FBXO11 GENOMIC DNA AMPLIFICATION AND SEQUENCING**

|                    |                           |                 |                           |
|--------------------|---------------------------|-----------------|---------------------------|
| FBXO11-Ex1-2F      | CTCCCTCCCGAATTGAAG        | FBXO11-Ex1-2R   | AAAGTCAGAGGGAGAGGTCAGG    |
| FBXO11-Ex3F        | TGTGTTACCCATGAAACCCAC     | FBXO11-Ex3R     | CCGACTTTCCTACCATGTTTAGC   |
| FBXO11-Ex4F        | TCTAGCCTGGATGACAGTGAGAC   | FBXO11-Ex4R     | CGCCAGCCATAAATTATTTTC     |
| FBXO11-Ex5-6F      | GAAACCCTGTTCTTTGTTTCTGG   | FBXO11-Ex5-6R   | TCTTCATTCTACTTTACCAGCAG   |
| FBXO11-Ex7-8F      | AGCAAAGGCTGATGATGAAA      | FBXO11-Ex7-8R   | GGACATGTCCTTGACCACCT      |
| FBXO11-Ex9-10F     | ACACCACAATGCACACCACT      | FBXO11-Ex9-10R  | GAACGCTATCACCTCTACATGG    |
| FBXO11-Ex11F       | GCCCAGCCTTAAATGTTTCTAATAC | FBXO11-Ex11R    | CAATAGCTATGGCTCATTGAGATG  |
| FBXO11-Ex12F       | TGAAGAAATTGAGGCCTTAGAAGT  | FBXO11-Ex12R    | TCAGTGCTCCACTTGGGTAG      |
| FBXO11-Ex13F       | GCCTGCAGCTCTCTGCATC       | FBXO11-Ex13R    | TTAAGATACTGGCAGGGAGAAGAAG |
| FBXO11-Ex14-15F    | TGCCATTACCTCCTTACTCGG     | FBXO11-Ex14-15R | CCAGTGGCTTCTGTCCCTCAC     |
| FBXO11-Ex16F       | TTCTCAGGGCATCTTGGACTC     | FBXO11-Ex16R    | GTGATCCACCCATCTCCGG       |
| FBXO11-Ex17F       | CCACTGCACACTCCAGCC        | FBXO11-Ex17R    | GGCACTAATCTCTAAACCAAGTTC  |
| FBXO11-Ex18F       | TGGAGATGGCAGATTATTGGTC    | FBXO11-Ex18R    | CATTTCAGCCACTTCAGCACAC    |
| FBXO11-Ex19F       | ACTGTTGGTGGTTGAAATAGGTATC | FBXO11-Ex19R    | TCCAACCATTTAGAACCAAAGC    |
| FBXO11-Ex20F       | GCTTTGGTTCTAAATGTTGGAG    | FBXO11-Ex20R    | ACCACGCCTACCCACAGTTAC     |
| FBXO11-Ex21-22F    | GGTCTCTTAAAGCCAAAGGTC     | FBXO11-Ex21-22R | ACCCAGCTTTGAGATCCTGAG     |
| FBXO11-Ex3-SeqF    | CATTAGATAAAATGAAAAGT      |                 |                           |
| FBXO11-Ex4-SeqF    | TCTTACTCAAGTTTTTGAGGC     |                 |                           |
| FBXO11-Ex9-10-SeqF | GACTATATATAACAGATCATG     |                 |                           |
| FBXO11-Ex9-10-SeqR | CATTATCCTCATATATTCCC      |                 |                           |
| FBXO11-Ex14-SeqR   | AAAGCTTTTTCAAGGGACAAG     |                 |                           |
| FBXO11-Ex17-SeqF   | AAATATACCTTCTAGATAACC     |                 |                           |

**PRIMERS FOR GENE COPY NUMBER ANALYSIS**

|                 |                          |     |                      |     |                       |
|-----------------|--------------------------|-----|----------------------|-----|-----------------------|
| FBXO11_probe #1 | CHR_2(26965666-26965733) | FWD | CTCCATGACCACCACTCCTT | REV | ATGACACAGCCCTCATCTCC  |
| FBXO11_probe #2 | CHR_2(26864659-26864712) |     | ACTTGGCCAATTTCAACCAG |     | TCAGACCCCCAATTTTCAGAG |
| CHR5_probe #1   | CHR_5 (217588-217670)    |     | CGGATCGTTAATTTGCAAGT |     | GTCTCCTCCCACCACACACT  |
| CHR5_probe #2   | CHR_5(244549-244638)     |     | GCAACAGAAGAAGCCCTTTG |     | ACGAGCTCCACACTGACCTT  |
| CHR6_probe #2   | CHR_6(33230146-33230235) |     | ACTGTTGGGAGGGAACCTCT |     | TCAAACAAGTCAACCCACACA |
| CHR12_probe #1  | CHR_12(6585217-6585317)  |     | GCTTGCCCTGTCCAGTTAAT |     | TAGCTCAGCTGCACCCCTTTA |
| CHR12_probe #2  | CHR_12(6587237-6587298)  |     | AGGGCCCTGACAACTCTTTT |     | CCCTGTTGCTGTAGCCAAAT  |

**PRIMERS FOR QPCR ANALYSIS OF mRNA**

|         |                        |                       |
|---------|------------------------|-----------------------|
| hFBXO11 | FWD                    | REV                   |
| hIRF4   | GATGGACGAGGCCATTATTGA  | TGTTATGCCGAACAATTGGA  |
| hRPS13  | CACTTGTGTGTGCGTGTGTCAG | TGACTGGAGAGCAATGAACG  |
| hGAPDH  | CAGTCGGCTTTACCCCTATCG  | CCCTTCTTGGCCAGTTTGTA  |
| hSDHA   | TGCACCACCAACTGCTTAGC   | GGCATGGACTGTGGTCATGAG |
|         | TACAAGGTGCGGATTGATGA   | GGTGTGCTTCTCCAGTGCT   |

**Targeting Sequences of siRNA oligos**

|                           |                      |
|---------------------------|----------------------|
| FBXO11 siRNAs #1          | GUAAAUUGUAGCCCUAUUA  |
| FBXO11 siRNAs #2          | AAUAGUGACCCAACAUAUA  |
| FBXO11 siRNAs #3          | GAAAGUUGCAAUAUACACA  |
| FBXO11 siRNAs #4          | GCAAUGCAUUAAGCAGGAAU |
| LacZ siRNA                | CGUACGCGGAUACUUCGA   |
| Non-targeting siRNA (NTS) | UGGUUUACAUGUCGACUAA  |

**Targeting Sequences of shRNAs**

|                  |                     |
|------------------|---------------------|
| FBXO11 shRNAs #1 | GAGTTTACATCTTTGGTGA |
| FBXO11 shRNAs #2 | CAATTGTTCCGCATAACAA |
| FBXO11 shRNAs #3 | TGGATTAAGACAGATAGTA |
| FBXO11 shRNAs #4 | AGGCTGTTAGTAGAGGCCA |
| FBXO11 shRNAs #5 | AGATAGTAATCCTACACTA |

**Supplementary Table 3**

Primers, siRNAs and shRNAs sequences used in this study.

## Supplementary References

- 1 Benmaamar, R. & Pagano, M. Involvement of the SCF complex in the control of Cdh1 degradation in S-phase. *Cell Cycle* 4, 1230-1232, (2005).
- 2 Piva, R. *et al.* In vivo interference with skp1 function leads to genetic instability and neoplastic transformation. *Mol Cell Biol* 22, 8375-8387, (2002).
- 3 Yen, H. C. & Elledge, S. J. Identification of SCF ubiquitin ligase substrates by global protein stability profiling. *Science* 322, 923-929, (2008).
- 4 Kageshita, T. *et al.* Increased expression of germinal center-associated nuclear protein (GANP) is associated with malignant transformation of melanocytes. *J Dermatol Sci* 42, 55-63, (2006).
- 5 Alonso, S. R. *et al.* Progression in cutaneous malignant melanoma is associated with distinct expression profiles: a tissue microarray-based study. *Am J Pathol* 164, 193-203, (2004).
- 6 Niu, H., Ye, B. H. & Dalla-Favera, R. Antigen receptor signaling induces MAP kinase-mediated phosphorylation and degradation of the BCL-6 transcription factor. *Genes Dev* 12, 1953-1961, (1998).
- 7 Edgar, R., Domrachev, M. & Lash, A. E. Gene Expression Omnibus: NCBI gene expression and hybridization array data repository. *Nucleic Acids Res* 30, 207-210, (2002).
- 8 Green, M. R. *et al.* Integrative analysis reveals selective 9p24.1 amplification, increased PD-1 ligand expression, and further induction via JAK2 in nodular sclerosing Hodgkin lymphoma and primary mediastinal large B-cell lymphoma. *Blood* 116, 3268-3277, (2010).
- 9 Green & Griffiths. A genomic profiling of human lymphomas. *Unpublished*.
- 10 Kato, M. *et al.* Frequent inactivation of A20 in B-cell lymphomas. *Nature* 459, 712-716, (2009).
- 11 Hans, C. P. *et al.* Confirmation of the molecular classification of diffuse large B-cell lymphoma by immunohistochemistry using a tissue microarray. *Blood* 103, 275-282, (2004).
- 12 Wang, X., Li, Z., Naganuma, A. & Ye, B. H. Negative autoregulation of BCL-6 is bypassed by genetic alterations in diffuse large B cell lymphomas. *Proceedings of the National Academy of Sciences of the United States of America* 99, 15018-15023, (2002).
- 13 Pasqualucci, L. *et al.* Mutations of the BCL6 proto-oncogene disrupt its negative autoregulation in diffuse large B-cell lymphoma. *Blood* 101, 2914-2923, (2003).
- 14 Bahram, F., von der Lehr, N., Cetinkaya, C. & Larsson, L. G. c-Myc hot spot mutations in lymphomas result in inefficient ubiquitination and decreased proteasome-mediated turnover. *Blood* 95, 2104-2110, (2000).
- 15 Bhatia, K. *et al.* Point mutations in the c-Myc transactivation domain are common in Burkitt's lymphoma and mouse plasmacytomas. *Nature Genetics* 5, 56-61, (1993).
- 16 Zhao, X. *et al.* The N-Myc-DLL3 cascade is suppressed by the ubiquitin ligase Huwe1 to inhibit proliferation and promote neurogenesis in the developing brain. *Developmental Cell* 17, 210-221, (2009).
